# Supplementary material for: Design and synthesis of new luminescent coordination networks of sql topology showing the highest degrees of interpenetration
Source: Royal Society of Chemistry journal article supplement (doi:10.1039/d2ce00884j), 2022-01-01
Supplement: d2ce00884j2.xlsx [file d2ce00884j2.xlsx]

## Sheet: Table S3
RefCode	Secondary Building Unit	Linkers (* = disordered)	Curvature at Linker (Average A-B-A Angle) [°]	Length of Edges [Å]	Span of Undulation [Å]	Distance between Centers of Rings with Common Edge [Å]	Distance from Center of Ring to Vertices [Å]	Working Diagonal (Where Nodes Aligned) [Å]	Placement of Nodes on the Working Diagonal	Shortest Distance between Nodes [Å]	Shape of Ring	Shape of Net	Number of Interpenetrating Nets (Z)	Periodicity of Hopf Ring Net	Connectivity of Hopf Ring Net	Topology of Hopf Ring Net	Topology of Extended Ring Net	Formula	Compound	Authors	Reference	doi	Counterions and Solvents
ACUCIK	Zn	C12H8NO2S	144	13.333	2.22	13.147	8.647|10.027	19.931	long diagonal	9.9655	envelope	undulated	2	2D	4	sql	8-c (4,4)IV	(C24H16N2O4S2Zn)n	catena-(bis(μ-5-(2-(3-pyridyl)ethenyl)thiophene-2-carboxylato)-zinc(II))	O.R.Evans,Wenbin Lin	Chem.Mater. (2001) 13, 3009.	http://dx.doi.org/10.1021/cm010427k	—
AGOMER	Zn	C10H8N3O2	146	11.545|11.658	0.06	11.602	7.57|7.656|8.755	15.225	short diagonal	7.6125	envelope	undulated	2	2D	4	sql	8-c (4,4)IV	(C20H16N6O4Zn)n	catena-(bis(μ-2-methyl-4-(4H-1,2,4-triazol-4-yl)benzoato)-zinc(II))	Chen Shui-Sheng	CSD Communication (2018).	http://dx.doi.org/10.5517/ccdc.csd.cc20txzr	—
AKIZUR	Cu	C20H18N4O2	148	16.324	0	16.324	9.629|13.182	19.258	center	9.629	rhombic	flat	2	2D	4	sql	8-c (4,4)IV	(C40H40CuN8O62+)n 2n(ClO4–) 2n(H2O)	catena-(bis(μ-2,2'-(1,4-phenylene)bis(N-(pyridin-3-yl)acetamide))-diaqua-copper(II) diperchlorate dihydrate)	K.Maity, K.Biradha	Cryst.Growth Des. (2016) 16, 3002.	http://dx.doi.org/10.1021/acs.cgd.6b00381	ClO4– and H2O
AMILUF	C2O4Ni	C14H14N4|C18H12O2	128	12.681|14.112	1.81	13.266	6.738|11.09|11.923	22.942	long diagonal	11.471	envelope	undulated	2	2D	4	sql	8-c (4,4)IV	(C34H26N4NiO6)n	catena-((μ-1,2-bis(4-carboxylatophenoxy)benzene)-(μ-1-(4-(1H-imidazol-1-ylmethyl)benzyl)-1H-imidazole)-nickel(II))	Yongnian Yan,Yanjuan Qi	Z.Kristallogr.-New Cryst.Struct. (2016) 231, 109.	http://dx.doi.org/10.1515/ncrs-2015-0053	—
ARUCEX	CO2Co	C24H18N4O3|C7H4O2	152	10.159|23.238	0	10.159|23.238	12.617|12.744	25.234	center	12.617	parallelogram	flat	2	2D	4	sql	8-c (4,4)IV	(C32H22CoN4O7)n 2n(H2O)	catena-((μ-isophthalato)-(μ-4,4'-oxybis(N-(pyridin-4-yl)benzamide))-cobalt(II) dihydrate)	Sumi Ganguly, S.Mukherjee, P.Dastidar	Cryst.Growth Des. (2016) 16, 5247.	http://dx.doi.org/10.1021/acs.cgd.6b00805	H2O
BEQHUC	C28H8N8O32Cu4	C18H32N6*	159	19.749	0	19.749	13.9645	27.929	center	13.9645	square	flat	2	2D	4	sql	8-c (4,4)IV	(C28H28Cu2N10O14)n	catena-(bis(μ-3,5-dinitro-2-oxidobenzoato)-(μ- 1,1'-decane-1,10-diylbis(1H-1,2,4-triazole))-di-copper(II))	Yan Yang, Peng Du, Jin Yang, Wei-Qiu Kan, Jian-Fang Ma	CrystEngComm (2013) 15, 4357.	http://dx.doi.org/10.1039/C3CE00034F	—
BEQPUK	C2O4Zn	C12H8O|C16H12N2	140	13.29|14.627	0	13.29|14.627	8.74|10.904	17.48	center	8.74	parallelogram	flat	2	2D	4	sql	8-c (4,4)IV	(C30H20N2O5Zn)n n(H2O)	catena-((μ-4,4'-oxydibenzoato)-(μ-4,4'-(1,3-phenylene)dipyridine)-zinc(II) monohydrate)	Jin-Song Hu, Xi-Hui Liu, Jian-Jun Shi, Hong-Long Xing, Jie He	Wuji Huaxue Xuebao (2013) 29, 444.	http://dx.doi.org/10.3969/j.issn.1001-4861.2013.00.130	H2O
BOQJOI	CO3Cd	C13H8O4S|C19H16N4O2	129	13.641|17.198	0	13.641|17.198	6.398|14.142	12.796	center	6.398	parallelogram	flat	2	2D	4	sql	8-c (4,4)IV	(C33H26CdN4O9S)n n(C3H7NO)	catena-((μ-4,4'-sulfonyldibenzoato)-(μ-1,1'-(methylenebis(oxy-4,1-phenylene))bis(1H-imidazole))-cadmium(II) N,N-dimethylformamide solvate)	Huadong Guo, Yongnian Yan, Xianmin Guo, Hengye Zou, Yanjuan Qi, Chunming Liu	CrystEngComm (2014) 16, 10245.	http://dx.doi.org/10.1039/C4CE01390E	DMF
BUYPOB	Mn	C18H24O6P2	175	18.047	0	18.047	12.761	25.522	center	12.761	square	flat	2	2D	4	sql	8-c (4,4)IV	(C36H48MnN2O18P4)n	catena-(tetrakis(μ-tetramethyl(biphenyl-4,4'-diylbis(methylene))bis(phosphonate))-dinitrato-manganese(II))	Xiangdong Zhang, Chunhua Ge, Jing Yin, Yang Zhao, Cui He	Chin.J.Chem. (2009) 27, 1195.	http://dx.doi.org/10.1002/cjoc.200990201	—
CARGEI	Ag	C8N8Ag5	154	16.354	0	16.354	7.804|14.372	28.744	long diagonal	9.58133	rhombic	flat	3	2D	8	8L5	12L14	6n(Cs+) (C16Ag11N165–)n (C2AgN2–)n 2n(C2H3N)	catena-(hexa-cesium dodecakis(μ-cyano-C,N)-tetracyano-undeca-silver(I) dicyano-silver(I) acetonitrile solvate)	V.Urban, T.Pretsch, H.Hartl	Angew.Chem.,Int.Ed. (2005) 44, 2794.	http://dx.doi.org/10.1002/anie.200462793	Cs+, [{Ag(CN)2}–]n chains and MeCN
CEHLOT	Zn	C13H15N2O3	120	10.622	0	10.622	6.691|8.25	13.382	center	6.691	rhombic	flat	2	2D	4	sql	8-c (4,4)IV	(C26H30N4O6Zn)n	catena-(bis(μ-(1R,2R)-2-(pyridin-4-ylcarbamoyl)cyclohexanecarboxylato)-zinc(II))	Yan-Wu Zhao, Yan Wang, Xian-Ming Zhang	ACS Applied Materials and Interfaces (2017) 9, 20991.	http://dx.doi.org/10.1021/acsami.7b04640	—
CEWZAI	Zn	C6H2O4S|C7H10N6	135	9.29|11.006	1.01	10.043	5.768|7.119|7.766	12.248	short diagonal	6.124	envelope	undulated	2	2D	4	sql	8-c (4,4)IV	(C13H12N6O4SZn)n 0.5n(C3H7NO)	catena-((μ-thiophene-2,5-dicarboxylato)-(μ-1,1'-(propane-1,3-diyl)bis(1H-1,2,4-triazole))-zinc(II) N,N-dimethylformamide solvate)	E.Yu.Semitut,T.S.Sukhikh,E.Yu.Filatov,A.A.Ryadun,A.S.Potapov	Crystals (2017) 7, 354.	http://dx.doi.org/10.3390/cryst7120354	DMF
CITSUW	Zn	C18H11O6S*|C28H22N4*	141	13.362|14.724	0	14.035	8.013|11.115|11.945	23.06	long diagonal	11.53	kite	flat	2	2D	4	sql	8-c (4,4)IV	(C80H68N8O12S2Zn2)n	catena-(bis(μ-1-((4-((2,6-dimethyl-1H-benzimidazol-1-yl)methyl)phenyl)methyl)-2,5-dimethyl-1H-benzimidazole)-bis(μ-4,4'-sulfonyldibenzoato)-di-zinc(II))	Lu Liu, Jichao Wang, Chunying Xu, Yuquan Zhang, Ying Li, Changgong Li, Jianji Wang, Yuping Zhang	J.Mol.Struct. (2019) 1180, 7.	http://dx.doi.org/10.1016/j.molstruc.2018.11.058	—
Compound 1	Ag	C29H19N2O2	147	26.345	0	26.345	16.330|20.673	41.346	long diagonal	5.90657	rhombic	flat	7	2D	24	24L	28L1	(C58H36AgN4O4+)n n(CF3O3S–)	catena-(bis(μ-(Z)-4',4'''-(1-hydroxy-3-oxoprop-1-ene-1,3-diyl)bis(((1,1'-biphenyl)-4-carbonitrile)))-silver(I) trifluoromethanesulfonate)	This work	This work		CF3SO3–
Compound 2	Ag	C29H19N2O2	147	26.498	0	26.498	16.927|20.387	40.774	long diagonal	5.09675	rhombic	flat	8	2D	28	28L	32L1	(C58H36AgN4O4+)n n(NO3–) 3n(H2O)	catena-(bis(μ-(Z)-4',4'''-(1-hydroxy-3-oxoprop-1-ene-1,3-diyl)bis(((1,1'-biphenyl)-4-carbonitrile)))-silver(I) nitrate trihydrated)	This work	This work		NO3– and H2O
COTPOS	C2O5Cd	C26H19N|C33H24N4	117	18.173|18.606	1.05	18.359	11.905|13.854|14.138	27.972	long diagonal	6.993	envelope	undulated	4	2D	12	12L2	16L1	(C61H43CdN5O4)n 2n(H2O)	catena-((μ-4,4'-(9-ethyl-9H-carbazole-3,6-diyl)dibenzoato)-(μ-4-(pyridin-4-yl)-N,N-bis(4-(pyridin-4-yl)phenyl)aniline)-cadmium(II) dihydrate)	Ming-Dao Zhang,Yan Jiao,Jun Li,Min-Dong Chen	Mendeleev Commun. (2015) 25, 65.	http://dx.doi.org/10.1016/j.mencom.2015.01.024	H2O
COVQAH	C2O4Co	C18H16N6|C25H15O2	134	16.498|17.223	0	16.498|17.223	9.529|13.914	19.058	center	9.529	parallelogram	flat	2	2D	4	sql	8-c (4,4)IV	(C45H31CoN6O6)n n(H2O)	catena-((μ-1,3,5-tris(4-carboxylatophenyl)benzene)-(μ-1,1'-(biphenyl-4,4'-diylbis(methylene))bis(1H-1,2,4-triazole))-cobalt(II) monohydrate)	Yan Gao, Li-Ming Fan, Wei-Kuo Song, Xin-Zheng Liu, Xiu-Tang Zhang,	Jiegou Huaxue (2014) 33, 1333.	n.a.	H2O
CUSTIU	C2O4Cd	C12H10NO	142	14.004	0	14.004	8.736|10.945	21.89	long diagonal	7.29667	rhombic	flat	3	2D	8	8L5	12L14	(C26H20CdN2O6)n	catena-(bis(μ-4-(pyridin-3-ylmethoxy)benzoato)-cadmium(II))	Shun-Li Li, Ke Tan, Ya-Qian Lan, Jun-Sheng Qin, Mei-Na Li, Dong-Ying Du, Hong-Ying Zang, Zhong-Min Su,	Cryst.Growth Des. (2010) 10, 1699.	http://dx.doi.org/10.1021/cg9012763	—
CUSTOA	C2H2O5Cd	C12H10NO	138	13.626	0	13.626	6.769|11.826	13.538	center	6.769	rhombic	flat	2	2D	4	sql	8-c (4,4)IV	(C26H22CdN2O7)n	catena-(α-bis(μ-4-(pyridin-3-ylmethoxy)benzoato)-aqua-cadmium(II))	Shun-Li Li, Ke Tan, Ya-Qian Lan, Jun-Sheng Qin, Mei-Na Li, Dong-Ying Du, Hong-Ying Zang, Zhong-Min Su,	Cryst.Growth Des. (2010) 10, 1699.	http://dx.doi.org/10.1021/cg9012763	—
DABQIK	C2O4Co	C15H15N2*|C21H20N4*	149	14.858|18.491	1.08	16.574	10.401|11.813|14.147	25.937	long diagonal	8.64567	envelope	undulated	3	2D	8	8L5	12L14	(C36H31CoN5O4)n n(H2O)	catena-((μ-1,1'-((1,1'-biphenyl)-4,4'-diyl)bis(2-methyl-1H-imidazole))-(μ-4,4'-(azanediylbis(methylene))dibenzoato)-cobalt(II) monohydrate)	Tian-Yang Xu,Ya-Li Zhao,Jia-Ming Li,Zhong-Feng Shi	Wuji Huaxue Xuebao (2020) 36, 1735.	http://dx.doi.org/10.11862/CJIC.2020.183	H2O
DAMZOJ	Ag	C27H15N3O3	137	20.794	0	20.794	6.67|19.695	13.34	short diagonal	4.44667	rhombic	flat	3	2D	8	8L5	12L14	(C54H30AgN6O6+)n n(BF4–) 0.5n(C4H8O) 4.5n(H2O)	catena-(bis(μ-N-(4-cyanophenylmethylene)-4-(4-cyanophenoxy)-1,8-naphthalimide)-silver(I) tetrafluoroborate tetrahydrofuran solvate hydrate)	C.S.Hawes, K.Byrne, W.Schmitt, T.Gunnlaugsson,	Inorg.Chem. (2016) 55, 11570.	http://dx.doi.org/10.1021/acs.inorgchem.6b02137	BF4–, THF and H2O
DEPHIQ	C64H60N4O8	Cl2Hg	117	21.202	0	21.202	12.314|17.26	24.628	center	12.314	rhombic	flat	2	2D	4	sql	8-c (4,4)IV	(C64H60Cl4Hg2N4O8)n 0.5n(C6H5Cl) 2n(C2H6O) n(H2O)	catena-((μ4-dodecakis(methyl)-tetrakis(3-pyridylcarboxylato)pentacyclo[19.3.1.13,7.19,13.115,19]octacosa-1(25),3(28),4,6,9(27),11,12,15(26),16,18,21,23-dodecaene)-tetrachloro-di-mercury(II) chlorobenzene ethanol solvate hydrate)	G.Laugel, E.Graf, M.W.Hosseini, J.-M.Planeix, N.Kyritsakas	New J.Chem. (2006) 30, 1340.	http://dx.doi.org/10.1039/b607982m	chlorobenzene, EtOH and H2O
DEXLEZ	C2O4Cd	C12H8O|C16H13N2	140	13.669|14.833	0	13.669|14.833	8.791|11.232	17.582	center	8.791	parallelogram	flat	2	2D	4	sql	8-c (4,4)IV	(C30H20CdN2O5)n n(H2O)	catena-((μ-1,3-(4-pyridyl)benzene)-(μ-4,4'-oxydibenzoato)-cadmium(II) monohydrate)	Jin-Song Hu, Xi-Hui Liu, Jie He, Jian-Jun Shi, Hong-Long Xing	Jiegou Huaxue (2013) 32, 739.	n.a.	H2O
DIKHEL	Cu	C16H18N4O2	143	14.747	0	14.747	9.325|11.425	18.65	center	9.325	rhombic	flat	2	2D	4	sql	8-c (4,4)IV	(C32H40CuN8O62+)n 2n(ClO4–) 2n(H2O)	catena-(bis(μ-1,4-bis((3-pyridyl)carbonylamino)butane)-diaqua-copper(II) diperchlorate dihydrate)	M.Sarkar, K.Biradha	Cryst.Growth Des. (2007) 7, 1318.	http://dx.doi.org/10.1021/cg070100h	ClO4– and H2O
DIKHIP	Cu	C17H21N4O2*	143	14.774	0	14.774	9.37|11.422	18.74	center	9.37	rhombic	flat	2	2D	4	sql	8-c (4,4)IV	(C32H40CuN8O62+)n n(F6P–) n(ClO4–) 2n(H2O)	catena-(bis(μ-1,4-bis((3-pyridyl)carbonylamino)butane)-diaqua-copper(II) hexafluorophosphate perchlorate dihydrate)	M.Sarkar, K.Biradha	Cryst.Growth Des. (2007) 7, 1318.	http://dx.doi.org/10.1021/cg070100h	PF6–, ClO4– and H2O
DIKJOX	O2Cu	C16H18N4O2	142	14.574	0	14.574	9.295|11.225	18.59	center	9.295	rhombic	flat	2	2D	4	sql	8-c (4,4)IV	(C32H40CuN8O62+)n 2n(NO3–) 3n(H2O)	catena-(bis(μ-1,4-bis((3-pyridyl)carbonylamino)butane)-diaqua-copper(II) dinitrate trihydrate)	M.Sarkar, K.Biradha	Cryst.Growth Des. (2007) 7, 1318.	http://dx.doi.org/10.1021/cg070100h	NO3– and H2O
DOFQUL	Ag	C11H16N2*	139	12.168	0	12.168	7.799|9.34	18.68	long diagonal	6.22667	rhombic	flat	3	2D	8	8L5	12L14	(C18H24AgN4+)n n(ClO4–)	catena-(bis(μ-cis-1,3-bis(cyanomethyl)cyclopentane-N,N')-silver(I) perchlorate)	E.D.Genuis, J.A.Kelly, M.Patel, R.McDonald, M.J.Ferguson, G.Greidanus-Strom	Inorg.Chem. (2008) 47, 6184.	http://dx.doi.org/10.1021/ic800069f	ClO4–
DOFRAS	Ag	C11H14N2*	139	12.3	0	12.3	7.944|9.39	18.78	long diagonal	6.26	rhombic	flat	3	2D	8	8L5	12L14	(C18H24AgN4+)n n(F6P–)	catena-(bis(μ-cis-1,3-bis(cyanomethyl)cyclopentane-N,N')-silver(I) hexafluorophosphate)	E.D.Genuis, J.A.Kelly, M.Patel, R.McDonald, M.J.Ferguson, G.Greidanus-Strom	Inorg.Chem. (2008) 47, 6184.	http://dx.doi.org/10.1021/ic800069f	PF6–
EHAJED	C2O4Cd	C10H14N4|C6H10	130	9.076|13.767	0.49	11.301	6.334|8.057|10.148|10.885|12.512	18.936	long diagonal	9.468	envelope	undulated	2	2D	4	sql	8-c (4,4)IV	(C18H24CdN4O4)n 0.5n(H2O)	catena-((μ-1,1'-(butane-1,4-diyl)diimidazole)-(μ-cyclohexane-1,4-dicarboxylato)-cadmium(II) hemihydrate)	Shi Zhou,Bo Liu,Chuan-Bi Li	Acta Crystallogr.,Sect.C:Cryst.Struct.Commun. (2009) 65, m107.	http://dx.doi.org/10.1107/S0108270109002674	H2O
ENACUT	Zn	C18H9N5|C8H4O4	133	9.338|15.97	1.33	12.168	6.819|8.434|11.42	18.188	long diagonal	9.094	envelope	undulated	2	2D	4	sql	8-c (4,4)IV	(C26H19N5O4Zn)n 2(H2O)	catena-((μ-isophthalato)-(μ-bis(4-(1H-imidazol-1-yl)phenyl)amine)-zinc(II)dihydrate)	Hong-Jian Cheng,Xiao-Yan Tang,Rong-Xin Yuan,Jian-Ping Lang	CrystEngComm (2016) 18, 4851.	http://dx.doi.org/10.1039/C6CE00768F	H2O
FAGCAS	Ag	C13H14N2	142	13.577	0	13.577	7.226|11.494	22.988	long, not in center	7.219	rhombic	flat	2	2D	4	sql	8-c (4,4)IV	(C26H28AgN4+)n n(AsF6–)	catena-(bis(μ-1,3-bis(4-pyridyl)propane-N,N')-silver(I) hexafluoroarsenate)	L.Carlucci, G.Ciani, D.M.Proserpio, S.Rizzato	CrystEngComm (2002) 4, 121.	http://dx.doi.org/10.1039/b201288j	AsF6–
FAGCEW	Ag	C13H14N2	142	13.583	0	13.583	7.169|11.536	23.072	long diagonal	7.22	rhombic	flat	2	2D	4	sql	8-c (4,4)IV	(C26H28AgN4+)n n(F6P–)	catena-(bis(μ-1,3-bis(4-pyridyl)propane-N,N')-silver(I) hexafluorophosphate)	L.Carlucci, G.Ciani, D.M.Proserpio, S.Rizzato	CrystEngComm (2002) 4, 121.	http://dx.doi.org/10.1039/b201288j	PF6–
FAMDEE	Zn	C8H6NO4	138	9.651|11.236	0	9.651|11.236	7.05|7.745	14.1	center	7.05	parallelogram	flat	2	2D	4	sql	8-c (4,4)IV	(C16H12N2O8Zn)n 2n(H2O)	catena-(bis(μ-1-(carboxylatomethyl)pyridinium-4-carboxylato)-zinc(II) dihydrate)	Guo-Qiang Kong, Chuan-De Wu	CrystEngComm (2012) 14, 847.	http://dx.doi.org/10.1039/c1ce06052j	H2O
FAMDII	C2O4Cd	C7H6NO2	144	11.106	0	11.106	7.844|7.862	15.688	center	7.844	rhombic	flat	2	2D	4	sql	8-c (4,4)IV	(C16H12CdN2O8)n	catena-(bis(μ-1-(carboxylatomethyl)pyridinium-4-carboxylato)-cadmium(II))	Guo-Qiang Kong, Chuan-De Wu	CrystEngComm (2012) 14, 847.	http://dx.doi.org/10.1039/c1ce06052j	—
FIFBED	Zn	C14H22N4|C14H8N2O4	155	14.922|16.763	1.15	15.767	9.893|11.271|11.737	21.133	short diagonal	10.5665	envelope	undulated	2	2D	4	sql	8-c (4,4)IV	(C28H30N6O4Zn)n	catena-((μ-4,4'-diazene-1,2-diyldibenzoato)-(μ-1,1'-hexane-1,6-diylbis(2-methyl-1H-imidazole))-zinc(II))	Yuan-Feng Hou,Yang Yu,Ke-Fen Yue,Qing Wei,Yong-Liang Liu,Chun-Sheng Zhou,Yao-Yu Wang	CrystEngComm (2013) 15, 7161.	http://dx.doi.org/10.1039/C3CE41127C	—
FIJWOM	Zn	C10H14N4|C10H8O5	144	10.509|13.336	2.12	11.641	7.343|8.31|9.361	16.566	long diagonal	8.283	envelope	undulated	2	2D	4	sql	8-c (4,4)IV	(C20H22N4O5Zn)n n(H2O)	catena-((μ-4-(carboxylatomethoxy)-2-methylbenzoato)-(μ-1,1'-butane-1,4-diylbis(1H-imidazole))-zinc(II) monohydrate)	Ting-Ting Kang,Hao Tang,Yong-Li Wei,Shuang-Quan Zang	Z.Naturforsch.,B:Chem.Sci. (2013) 68, 403.	http://dx.doi.org/10.5560/ZNB.2013-3027	H2O
FIMYOR	C2O4Cd	C18H14N4O|C6H5	132	10.274|16.621	2.2	12.454	5.009|10.259|10.509	15.338	short diagonal	7.669	envelope	undulated	2	2D	4	sql	8-c (4,4)IV	(C25H24CdN4O5)n n(H2O)	catena-((μ-1,1'-(oxydi-4,1-phenylene)bis(1H-imidazole))-(μ-pimelato)-cadmium(II) monohydrate)	Jin-Song Hu,Xin Zhuo,Xi-Hui Liu,Hong-Long Xing,Jie He,He-Gen Zheng	Inorg.Chem.Commun. (2013) 33, 15.	http://dx.doi.org/10.1016/j.inoche.2013.04.005	H2O
FIQGEU	Zn	C16H11N2O2	151	15.725	0	15.725	10.841|11.391	22.782	long diagonal	7.594	rhombic	flat	3	2D	8	8L5	12L14	(C32H22N4O4Zn)n	catena-(bis(μ-4'-(1H-imidazol-1-yl)(1,1'-biphenyl)-4-carboxylato)-zinc(II))	Dana Bejan, L.G.Bahrin, S.Shova, M.Sardaru, Lilia Clima, A.Nicolescu, N.Marangoci, V.Lozan, C.Janiak,	Inorg.Chim.Acta (2018) 482, 275.	http://dx.doi.org/10.1016/j.ica.2018.05.024	—
FIWHIE	C2O4Cd	C13H8O3	130	13.458|14.134	0.59	13.773	6.918|7.562|11.728	14.468	short diagonal	7.234	envelope	undulated	2	2D	4	sql	8-c (4,4)IV	(C32H29BaCdNO13)n n(H2O)	catena-(D-(μ5-4,4'-oxydibenzoato)-(μ4-4,4'-oxydibenzoato)-aqua-(N,N-dimethylformamide)-methanol-barium-cadmium(II) monohydrate)	Huabin Zhang,Ping Lin,Xiaochen Shan,Liwei Han,Shaowu Du	CrystEngComm (2014) 16, 1245.	http://dx.doi.org/10.1039/C3CE42157K	Ba2+, MeOH, DMF and H2O
FIWHOK	C2O4Cd	C13H8O3	130	13.428|14.1	0.58	13.74	6.91|7.55|11.696	14.449	short diagonal	7.2245	envelope	undulated	2	2D	4	sql	8-c (4,4)IV	(C32H29BaCdNO13)n n(H2O)	catena-(L-(μ5-4,4'-oxydibenzoato)-(μ4-4,4'-oxydibenzoato)-aqua-(N,N-dimethylformamide)-methanol-barium-cadmium(II) monohydrate)	Huabin Zhang,Ping Lin,Xiaochen Shan,Liwei Han,Shaowu Du	CrystEngComm (2014) 16, 1245.	http://dx.doi.org/10.1039/C3CE42157K	Ba2+, MeOH, DMF and H2O
FOCLOB	Zn	C18H13N2O4	110	11.716	1.03	11.671	7.001|9.366	18.704	long diagonal	9.352	envelope	undulated	2	2D	4	sql	8-c (4,4)IV	(C36H26N4O8Zn)n	catena-(bis(μ-hydrogen-4,4'-((1H-imidazol-1-yl)methylene)dibenzoato)-zinc(II))	Min Yu,Fang Xuan,Guang-Xiang Liu	Wuji Huaxue Xuebao(Chin.)(Chin.J.Inorg.Chem.) (2019) 35, 133.	http://dx.doi.org/10.11862/CJIC.2019.018	unaccounted void of 49 Å3 per formula unit
FUBDUD	Zn	C14H8O5|C20H16N8	151	14.072|20.619	2.85	16.792	10.034|11.803|14.637	22.971	short diagonal	7.657	envelope	undulated	3	2D	8	8L5	12L14	(C34H24N8O5Zn)n n(H2O)	catena-(bis(μ-3,5-bis(4-(1H-imidazol-1-yl)phenyl)-4H-1,2,4-triazol-4-amine)-(μ-4,4'-oxydibenzoato)-zinc(II) monohydrate)	Bai-Qiao Song,Chao Qin,Yu-Teng Zhang,Xue-Song Wu,Hong-Sheng Liu,Kui-Zhan Shao,Zhong-Min Su	CrystEngComm (2015) 17, 3129.	http://dx.doi.org/10.1039/C4CE02473G	H2O
FUBFAL	Co	C14H8O5|C20H16N8	151	14.037|20.621	2.74	16.8	10.117|11.717|14.712	22.809	short diagonal	7.603	envelope	undulated	3	2D	8	8L5	12L14	(C34H24CoN8O5)n n(H2O)	catena-(bis(μ-3,5-bis(4-(1H-imidazol-1-yl)phenyl)-4H-1,2,4-triazol-4-amine)-(μ-4,4'-oxydibenzoato)-cobalt(II) monohydrate)	Bai-Qiao Song,Chao Qin,Yu-Teng Zhang,Xue-Song Wu,Hong-Sheng Liu,Kui-Zhan Shao,Zhong-Min Su	CrystEngComm (2015) 17, 3129.	http://dx.doi.org/10.1039/C4CE02473G	H2O
FUVDAE	Co	C10H8O5|C14H14N4	136	10.981|11.265	1.9	10.958	7.239|8.241|8.431	16.563	long diagonal	8.2815	envelope	undulated	2	2D	4	sql	8-c (4,4)IV	(C24H22CoN4O5)n n(H2O)	catena-((μ-(R)-4-(1-carboxylatoethoxy)benzoato)-(μ-1,1'-(1,3-phenylene)bis(2-methyl-1H-imidazole))-cobalt(II) monohydrate)	Zhong-Xuan Xu, Li-Feng Li, Xu-Ling Bai	Wuji Huaxue Xuebao (2020) 36, 1430.	http://dx.doi.org/10.11862/CJIC.2020.154	H2O
FUVDEI	Co	C10H8O5|C14H14N4	136	10.982|11.277	1.9	10.965	7.239|8.247|8.443	16.581	long diagonal	8.2905	envelope	undulated	2	2D	4	sql	8-c (4,4)IV	(C24H22CoN4O5)n n(H2O)	catena-((μ-(S)-4-(1-carboxylatoethoxy)benzoato)-(μ-1,1'-(1,3-phenylene)bis(2-methyl-1H-imidazole))-cobalt(II) monohydrate)	Zhong-Xuan Xu, Li-Feng Li, Xu-Ling Bai	Wuji Huaxue Xuebao (2020) 36, 1430.	http://dx.doi.org/10.11862/CJIC.2020.154	H2O
GIKQOI	CH2O3Co*	C13H14N2|C13H6N2O2Cl2	149	13.129|17.044	0	13.129|17.044	9.503|11.88	19.006	center	9.503	parallelogram	flat	2	2D	4	sql	8-c (4,4)IV	(C27H22Cl2CoN4O5)n	catena-((μ-4,4'-diazene-1,2-diylbis(2-chlorobenzoate))-(μ-4,4'-propane-1,3-diyldipyridine)-aqua-cobalt(II))	Jin-Shuang Guo, Gang Xu, Guo-Cong Guo, Jin-Shun Huang	Cryst.Growth Des. (2013) 13, 2642.	http://dx.doi.org/10.1021/cg400394d	—
GIKQUO	CH2O3Ni	C13H14N2|C13H6N2O2Cl2	149	13.077|16.995	0	13.077|16.995	9.479|11.835	18.958	center	9.479	parallelogram	flat	2	2D	4	sql	8-c (4,4)IV	(C27H22Cl2N4NiO5)n	catena-((μ-4,4'-diazene-1,2-diylbis(2-chlorobenzoate))-(μ-4,4'-propane-1,3-diyldipyridine)-aqua-nickel(II))	jin-Shuang Guo, Gang Xu, Guo-Cong Guo, Jin-Shun Huang	Cryst.Growth Des. (2013) 13, 2642.	http://dx.doi.org/10.1021/cg400394d	—
GIKRID	H2OCo	C13H14N2|C14H8N2O4	147	12.844|17.119	0	12.844|17.119	10.634|10.767	21.268	center	10.634	parallelogram	flat	2	2D	4	sql	8-c (4,4)IV	(C27H24CoN4O5)n	catena-((μ-4,4'-diazene-1,2-diyldibenzoate)-(μ-4,4'-propane-1,3-diyldipyridine)-aqua-cobalt(II))	Jin-Shuang Guo, Gang Xu, Guo-Cong Guo, Jin-Shun Huang	Cryst.Growth Des. (2013) 13, 2642.	http://dx.doi.org/10.1021/cg400394d	—
GOLNAX	C2O4Ni	C10H14N4|C6H10	130	8.655|13.248	0.58	10.82	6.167|7.613|9.693|10.405	18.009	long diagonal	9.0045	envelope	undulated	2	2D	4	sql	8-c (4,4)IV	(C18H24N4NiO4)n 0.25n(H2O)	catena-((μ-1,1'-(butane-1,4-diyl)di-imidazole)-(μ-cyclohexane-1,4-dicarboxylato)-nickel(II) hydrate)	Chun-Hui Yang,Guang Yang,Zhen-Wu Du,Jun-Feng Lv,Wei-Tian Yin	Acta Crystallogr.,Sect.E:Struct.Rep.Online (2009, 65, m263.	http://dx.doi.org/10.1107/S1600536809004024	H2O
GUKPAE	Zn	C10H14N4|C9H6O4	140	10.34|11.726	0.4	11.011	6.982|8.082|8.978	17.056	long diagonal	8.528	envelope	undulated	2	2D	4	sql	8-c (4,4)IV	(C19H20N4O4Zn)n n(H2O)	catena-((μ-1,1'-(butane-1,4-diyl)-bis(1H-imidazole))-(μ-4-(carboxylatomethyl)benzoato)-zinc(II) monohydrate)	Zhengfang Tian,Haibao Duan,Fang Xuan,Xiaoming Ren	Inorg.Chem.Commun. (2009) 12, 417.	http://dx.doi.org/10.1016/j.inoche.2009.03.004	H2O
HAJMOX	C38H28N4	C10H2O4F12Mn	92	16.469	0	16.469	11.645	23.29	center	11.645	square	flat	2	2D	4	sql	8-c (4,4)IV	(C58H32F24Mn2N4O8)n	catena-((μ-4,4',4'',4'''-(tricyclo[3.3.1.13,7]decane-1,3,5,7-tetrayl)tetrabenzonitrile)-tetrakis(1,1,1,5,5,5-hexafluoroacetylacetonato)-di-manganese(II))	T.Mocanu, Lidia Pop, N.D.Hadade, S.Shova, I.Grosu, M.Andruh	CrystEngComm (2017) 19, 27.	http://dx.doi.org/10.1039/C6CE02146H	unaccounted void of 414 Å3 per formula unit
HALSOF	C2O4Co	C12H8O|C20H17N5	122	12.704|13.755	0.95	13.174	7.153|8.067|10.785	15.19	short diagonal	7.595	envelope	undulated	2	2D	4	sql	8-c (4,4)IV	(C34H25CoN5O5)n n(C2H3N)	catena-((μ-9-ethyl-3,6-di(1H-imidazol-1-yl)-9H-carbazole)-(μ-4,4'-oxydibenzoato)-cobalt(II) acetonitrile solvate)	Jun-Ru Xue,Zhan Hu,Shu-Fang Zhang,Yue Liang,Xia Zhang,Lin-Hai Jing,Da-Bin Qin	Jiegou Huaxue(Chin.)(Chin.J.Struct.Chem.) (2016) 35, 1574.	http://dx.doi.org/10.14102/j.cnki.0254-5861.2011-1090	MeCN
HEQPUP	Cu	C24H12N2F8	140	17.919|18.545	0	18.21	5.595|6.536|17.177	12.131	short diagonal	6.0655	kite	flat	2	2D	4	sql	8-c (4,4)IV	(C48H24CuF16N4+)n n(NO3–) 2n(C2H3N) n(H2O)	catena-(bis(μ-4,4'-bis(4-pyridylmethyl)-2,2',3,3',5,5',6,6'-octafluorobiphenyl)-copper(I) nitrate acetonitrile solvate monohydrate)	K.Kasai, M.Sato	Chem.Asian J. (2006) 1, 344.	http://dx.doi.org/10.1002/asia.200600054	NO3–, MeCN and H2O
HOVFOO	C2O4Cd	C9H7N2	139	11.651	0.28	11.648	8.217|8.257	16.342	short diagonal	8.171	envelope	undulated	2	2D	4	sql	8-c (4,4)IV	(C20H14CdN4O4)n	catena-(bis(μ-4-(imidazol-1-yl)benzoato)-cadmium(II))	Jian Gao,Kai-Ju Wei,Jia Ni,Ju-Zhou Zhang	J.Coord.Chem. (2009) 62, 257.	http://dx.doi.org/10.1080/00958970802206777	—
HOVFOO01	C2O4Cd	C9H7N2	139	11.663	0.33	11.658	8.223|8.267	16.53	long diagonal	8.265	envelope	undulated	2	2D	4	sql	8-c (4,4)IV	(C20H14CdN4O4)n	catena-(bis(μ-4-(imidazol-1-yl)benzoato)-cadmium(II))	A.Aijaz,P.Lama,E.C.Sanudo,R.Mishra,P.K.Bharadwaj	New J.Chem. (2010) 34, 2502.	http://dx.doi.org/10.1039/c0nj00302f	—
HOVFOO02	C2O4Cd	C9H7N2	139	11.683	0.28	11.679	8.24|8.279	16.478	short diagonal	8.239	envelope	undulated	2	2D	4	sql	8-c (4,4)IV	(C20H14CdN4O4)n	catena-(bis(μ-4-(1H-imidazol-1-yl)benzoato)-cadmium(II))	Song Gao,Rui Qing Fan,Xin Ming Wang,Li Guo Wei,Yang Song,Xi Du,Kai Xing,Ping Wang,Yu Lin Yang	Phys.Chem.Chem.Phys.(PCCP) (2016) 18, 19001.	http://dx.doi.org/10.1039/C6CP02530G	—
HULREN	Ni	C10H7N2O2	143	11.416	0	11.416	8.072	16.144	center	8.072	square	flat	2	2D	4	sql	8-c (4,4)IV	(C20H14N4NiO4)n	catena-(bis(μ-4-(1H-imidazol-1-yl)benzoato)-nickel(II))	Xi-Hui Chao, Su-Hua He, De-Shan Yu, Peng Wang, Yi Li, Hao-Hong Li, Zhi-Rong Chen	J.Cluster Sci. (2015) 26, 1319.	http://dx.doi.org/10.1007/s10876-014-0816-z	—
IHUQIL	Ag	C34H24N6	125	16.197	0	16.197	11.453	22.906	center	11.453	square	flat	2	2D	4	sql	8-c (4,4)IV	(C68H48AgN12+)n n(ClO4–)	catena-(bis(μ-N,N'-bis(4-quinolylmethylene)benzil 2-hydrazone-N'',N''')-silver(I) perchlorate)	G.K.Patra, I.Goldberg	Cryst.Growth Des. (2003) 3, 321.	http://dx.doi.org/10.1021/cg034011q	ClO4–
IKESEY	Co	C16H11O6F|C20H18N4	151	15.296|17.658	0.26	16.467	6.562|14.474|15.761	30.234	long diagonal	15.117	envelope	undulated	2	2D	4	sql	8-c (4,4)IV	(C36H29CoFN4O6)n n(C2H6O) n(H2O)	catena-((μ-4-(4-(1-carboxylatoethoxy)phenoxy)-3-fluorobenzoato)-(μ-4,4'-bis(1H-imidazol-1-ylmethyl)biphenyl)-cobalt(II) ethanol solvate monohydrate)	Xin Xu,Ying-Hui Yu,Guang-Feng Hou,Xue-Wei Li,Chang-Yue Ren,Dong-Sheng Ma	Polyhedron (2016) 112, 61.	http://dx.doi.org/10.1016/j.poly.2016.03.037	EtOH and H2O
ILEBEI	C2O4Pb	C13H9N4	128	14.408|14.491	0	14.408|14.491	9.428|10.951	18.856	center	9.428	parallelogram	flat	2	2D	4	sql	8-c (4,4)IV	(C28H18N8O4Pb)n	catena-(bis(μ-4-(3-(pyridin-3-yl)-1H-1,2,4-triazol-5-yl)benzoato)-lead(II))	Shi-Jun Chen, Lei Li, Bao-Wei Liu, Ke-Zhi Ji, Xiao-Dong Xia, Kai Mu, Wei Liu	Z.Kristallogr.-New Cryst.Struct. (2016) 231, 863.	http://dx.doi.org/10.1515/ncrs-2015-0296	—
ILIZAG	Co	C16H11O6Cl|C20H18N4	150	15.332|17.508	0.3	16.41	6.788|14.356|15.551	29.905	long diagonal	14.9525	envelope	undulated	2	2D	4	sql	8-c (4,4)IV	(C36H29ClCoN4O6)n n(C2H6O) n(H2O)	catena-((μ-(R)-4-(4-(1-carboxylatoethoxy)phenoxy)-3-chlorobenzoato)-(μ-4,4'-bis(1H-imidazol-1-ylmethyl)biphenyl)-cobalt(II) ethanol solvate monohydrate)	Xin Xu,Ying-Hui Yu,Guang-Feng Hou,Xue-Wei Li,Chang-Yue Ren,Dong-Sheng Ma	Polyhedron (2016) 112, 61.	http://dx.doi.org/10.1016/j.poly.2016.03.037	EtOH and H2O
ILIZEK	Co	C16H11NO8|C20H18N4	151	15.363|17.526	0.3	16.434	6.835|14.364|15.553	29.916	long diagonal	14.958	envelope	undulated	2	2D	4	sql	8-c (4,4)IV	(C36H29CoN5O8)n n(C2H6O) n(H2O)	catena-((μ-(R)-4-(4-(1-carboxylatoethoxy)phenoxy)-3-nitrobenzoato)-(μ-4,4'-bis(1H-imidazol-1-ylmethyl)biphenyl)-cobalt(II) ethanol solvate monohydrate)	Xin Xu,Ying-Hui Yu,Guang-Feng Hou,Xue-Wei Li,Chang-Yue Ren,Dong-Sheng Ma	Polyhedron (2016) 112, 61.	http://dx.doi.org/10.1016/j.poly.2016.03.037	EtOH and H2O
INEFEN	Zn	C15H19N2O3	138	12.881	0	12.881	8.986|9.229	17.972	center	8.986	rhombic	flat	2	2D	4	sql	8-c (4,4)IV	(C30H38N4O6Zn)n 2n(H2O)	catena-(bis(μ-1,2,2-trimethyl-3-(4-pyridylcarbamoyl)cyclopentanecarboxylato)-zinc(II) dihydrate)	Qian Huang, Jiancan Yu, Junkuo Gao, Xingtang Rao, Xiuli Yang, Yuanjing Cui, Chuande Wu, Zhangjing Zhang, Shengchang Xiang, Banglin Chen, Guodong Qian	Cryst.Growth Des. (2010) 10, 5291.	http://dx.doi.org/10.1021/cg101135r	H2O
INEFIR	C2O4Cd	C14H19N2O	134	13.063	0	13.063	9.065|9.405	18.13	center	9.065	rhombic	flat	2	2D	4	sql	8-c (4,4)IV	(C30H38CdN4O6)n 2n(H2O)	catena-(bis(μ-1,2,2-trimethyl-3-(4-pyridylcarbamoyl)cyclopentanecarboxylato)-cadmium(II) dihydrate)	Qian Huang, Jiancan Yu, Junkuo Gao, Xingtang Rao, Xiuli Yang, Yuanjing Cui, Chuande Wu, Zhangjing Zhang, Shengchang Xiang, Banglin Chen, Guodong Qian	Cryst.Growth Des. (2010) 10, 5291.	http://dx.doi.org/10.1021/cg101135r	H2O
IQIJOI	CH6O2Ni	C13H14N2|C16H12O6	147	11.514|19.34	0	11.514|19.34	10.736|11.749	21.472	center	10.736	parallelogram	flat	2	2D	4	sql	8-c (4,4)IV	(C30H32N2NiO8)n	catena-((μ-1,2-bis(4-carboxylatophenoxy)ethane)-(μ-1,3-bis(4-pyridyl)propane)-aqua-methanol-nickel(II))	ian-Qiang Liu, Yao-Yu Wang, Yun-Sheng Huang	CrystEngComm (2011) 13, 3733.	http://dx.doi.org/10.1039/c0ce00871k	—
IQIJUO	CH2O3Co	C13H14N2|C15H12O4	144	11.987|18.711	0	11.987|18.711	10.183|11.967	20.366	center	10.183	parallelogram	flat	2	2D	4	sql	8-c (4,4)IV	(C29H28CoN2O7)n 0.63n(H2O)	catena-((μ-1,2-bis(4-carboxylatophenoxy)ethane)-(μ-1,3-bis(4-pyridyl)propane)-aqua-cobalt(II) hydrate)	Jian-Qiang Liu, Yao-Yu Wang, Yun-Sheng Huang	CrystEngComm (2011) 13, 3733.	http://dx.doi.org/10.1039/c0ce00871k	H2O
IWOCOO	Zn	C17H18N4O2|C6H2O4S	134	9.888|11.785	0	9.888|11.785	7.692	15.384	center	7.692	rectangle	flat	2	2D	4	sql	8-c (4,4)IV	(C23H20N4O6SZn)n n(H2O)	catena-((μ-1,4-diazepane-1,4-diylbis(pyridin-4-ylmethanone))-(μ-thiophene-2,5-dicarboxylato)-zinc(II) monohydrate)	A.D.Sample, R.L.LaDuca	Z.Anorg.Allg.Chem. (2016) 642, 966.	http://dx.doi.org/10.1002/zaac.201600197	H2O
IXOWEZ	C2O6Co*	C10H14|C12H12N6	117	9.191|11.303	0.87	10.148	6.275|7.372|7.812	14.06	short diagonal	7.03	envelope	undulated	2	2D	4	sql	8-c (4,4)IV	(C24H26CoN6O4)n	catena-((μ-adamantane-1,3-dicarboxylato)-(μ-1-(2-(1H-1,2,4-triazol-1-ylmethyl)benzyl)-1H-1,2,4-triazole)-cobalt(II))	Shan Zhao, Tian-Rui Zheng, Ya-Qian Zhang, Xiu-Xiu Lv, Bao-Long Li, Yong Zhang	Polyhedron (2017) 121, 61.	http://dx.doi.org/10.1016/j.poly.2016.09.061	—
JOMVIQ	C2O4Cd	C13H10N	137	13.926	0	13.926	9.361|10.311	18.722	short diagonal	6.24067	rhombic	flat	3	2D	8	8L5	12L14	(C28H20CdN2O4)n	catena-(cis-bis(μ-3-(2-(4-Pyridyl)ethenyl)benzoato)-cadmium(II))	Wenbin Lin, O.R.Evans, Ren-Gen Xiong, Zhiyong Wang	J.Am.Chem.Soc. (1998) 120, 13272.	http://dx.doi.org/10.1021/ja983415h	—
JOMVIQ01	C2O4Cd	C13H10N*	137	13.926	0	13.926	9.361|10.311	18.722	short diagonal	6.24067	rhombic	flat	3	2D	8	8L5	12L14	(C28H20CdN2O4)n	catena-(cis-bis(μ-3-(2-(4-pyridyl)ethenyl)benzoato)-cadmium(II))	O.R.Evans, Wenbin Lin	Chem.Mater. (2001) 13, 3009.	http://dx.doi.org/10.1021/cm010427k	—
JORQIT	CO2Co	C14H14N4O2|C9H14O2	135	8.916|14.874	0.02	11.802	5.341|8.992|12.318	21.31	long diagonal	10.655	envelope	undulated	2	2D	4	sql	8-c (4,4)IV	(C24H28CoN4O6)n	catena-((μ-N,N'-(ethane-1,2-diyl)di(pyridine-4-carboxamide))-(μ-1,2,2-trimethylcyclopentane-1,3-dicarboxylato)-cobalt(II))	J.J.Przybyla,F.C.Ezenyilimba,R.L.LaDuca	Inorg.Chim.Acta (2019) 498, 119087.	http://dx.doi.org/10.1016/j.ica.2019.119087	—
KINFUL	Co	C14H8O4|C20H21N4O*	149	14.431|17.021	1.38	15.624	10.338|10.922|12.65	23.532	long diagonal	7.844	envelope	undulated	3	2D	8	8L5	12L14	(C34H26CoN4O5)n	catena-((μ-1,1'-(oxydi(4,1-phenylene))bis(2-methyl-1H-imidazole))-(μ-(1,1'-biphenyl)-4,4'-dicarboxylato)-cobalt(II))	N.-N.Chen, J.-L.Ni, J.Wang	Acta Crystallogr.,Sect.C:Cryst.Struct.Chem. (2018) 74, 1123.	http://dx.doi.org/10.1107/S2053229618012433	—
KINKOJ	C2O4Cd	C12H8O|C18H14N6	150	14.37|19.611	0	14.37|19.611	11.857|12.448	23.714	center	11.857	parallelogram	flat	2	2D	4	sql	8-c (4,4)IV	(C32H22CdN6O5)n 0.5n(CH4O) 0.5n(H2O)	catena-((μ-4,4'-Oxydibenzoato)-(μ-1,1'-(diazene-1,2-diyldi-4,1-phenylene)bis(1H-imidazole))-cadmium(II) methanol solvate hemihydrate)	Ruchi Singh, P.K.Bharadwaj	Cryst.Growth Des. (2013) 13, 3722.	http://dx.doi.org/10.1021/cg400756z	MeOH and H2O
KUBCUI	Zn	C18H14N4O2*|C8H4O4	133	9.383|15.792	1.37	12.134	6.934|8.34|11.347	18.227	long diagonal	9.1135	envelope	undulated	2	2D	4	sql	8-c (4,4)IV	(C26H18N4O5Zn)n 2n(H2O)	catena-((μ-1,1'-(oxydi(4,1-phenylene))di(1H-imidazole))-(μ-benzene-1,3-dicarboxylato)-zinc(II) dihydrate)	Bo-Tao Xu, Ze-Jun Mao, Li-Xiang He, Sheng-Cong Guo, Guo-Dong Zhang	Z.Kristallogr.-New Cryst.Struct. (2019) 234, 973.	http://dx.doi.org/10.1515/ncrs-2019-0191	H2O
KUXTON	Cl4Cu4	C9H12N4	144	12.957	0	12.957	9.162	18.324	center	9.162	square	flat	2	2D	4	sql	8-c (4,4)IV	(C9H12Cl2Cu2N4)n	catena-(bis(μ3-chloro)-(μ-bis(2-methylimidazol-1-yl)methane)-di-copper(I))	Chuan-Ming Jin, Zhu Zhu, Ming-Xia Yao, Xiang-Gao Meng	CrystEngComm (2010) 12, 358.	https://doi.org/10.1039/B915584H	—
LIQVEN	Co	C10H7N2O2	143	11.421	0	11.421	8.076	16.152	center	8.076	square	flat	2	2D	4	sql	8-c (4,4)IV	(C20H14CoN4O4)n	catena-(bis(μ-4-(imidazol-1-yl)benzoato-N,O)-cobalt(II))	Ju-Zhou Zhang, Wei-Ran Cao, Jian-Xin Pan, Qian-Wang Chen	Inorg.Chem.Commun. (2007) 10, 1360.	http://dx.doi.org/10.1016/j.inoche.2007.08.016	—
LIQVEN01	Co	C10H7N2O2	143	11.429	0	11.429	8.081	16.162	center	8.081	square	flat	2	2D	4	sql	8-c (4,4)IV	(C20H14CoN4O4)n	catena-(bis(μ-4-imidazolylbenzoato)-cobalt(II))	Ke-Hui Cui, Shi-Yan Yao, Hai-Qin Li, Yan-Tao Li, Hai-Ping Zhao, Chun-Jie Jiang, Yun-Qi Tian	CrystEngComm (2011) 13, 3432.	http://dx.doi.org/10.1039/c0ce00789g	—
LODNOJ	Zn	C14H9N4O2	146	15.479|15.508	0	15.479|15.508	8.968|12.634	17.936	center	8.968	parallelogram	flat	2	2D	4	sql	8-c (4,4)IV	(C28H18N8O4Zn)n 1.5n(H2O)	catena-(bis(μ-4-(5-(pyridin-4-yl)-4H-1,2,4-triazol-3-yl)benzoato)-zinc(II) sesquihydrate)	Yun Gong, Jian Hua Lin	Cryst.Growth Des. (2014) 14, 649.	http://dx.doi.org/10.1021/cg401529u	H2O
LODNUP	Co	C14H9N4O2	147	15.382|15.414	0	15.382|15.414	8.947|12.532	17.894	center	8.947	parallelogram	flat	2	2D	4	sql	8-c (4,4)IV	(C28H18CoN8O4)n 1.5(H2O)	catena-(bis(μ-4-(5-(pyridin-4-yl)-4H-1,2,4-triazol-3-yl)benzoato)-cobalt(II) sesquihydrate)	Yun Gong, Jian Hua Lin	Cryst.Growth Des. (2014) 14, 649.	http://dx.doi.org/10.1021/cg401529u	H2O
LODPAX	Cu	C14H9N4O2	151	15.466|15.543	0	15.466|15.543	9.949|11.892	19.898	center	9.949	parallelogram	flat	2	2D	4	sql	8-c (4,4)IV	(C28H18CuN8O4)n 1.5(H2O)	catena-(bis(μ-4-(5-(pyridin-4-yl)-4H-1,2,4-triazol-3-yl)benzoato)-copper(II) sesquihydrate)	Yun Gong, Jian Hua Lin	Cryst.Growth Des. (2014) 14, 649.	http://dx.doi.org/10.1021/cg401529u	H2O
MADSOB	C2O4Ni	C12H8|C13H14N2	141	12.823|12.983	1.18	12.849	8.157|9.911|10.015	19.89	long diagonal	9.945	envelope	undulated	2	2D	4	sql	8-c (4,4)IV	C27H22N2NiO4)n	catena-((μ-biphenyl-3,4'-dicarboxylato)-(μ-4,4'-propane-1,3-diyldipyridine)-nickel(II)).	Feng Guo,Baoyong Zhu,Xiuling Zhang	J.Inorg.Organomet.Polym.Mater. (2010) 20, 118.	http://dx.doi.org/10.1007/s10904-009-9321-5	—
MAVNOO	C49H32	C8H14N2O6Zn	101	20.141	0	20.141	14.146|14.337	28.674	long diagonal	7.1685	rhombic	flat	4	2D	12	12L2	16L1	(C65H60N4O12Zn2)n 2n(C3H7NO) 4n(H2O)	catena-((μ4-methanetetrakis(biphenyl-4'-carboxylato))-tetrakis(dimethylformamide)-di-zinc(II) dimethylformamide solvate tetrahydrate)	Liang Wen, Peng Cheng, Wenbin Lin	Chem.Commun. (2012) 48, 2846.	http://dx.doi.org/10.1039/c2cc17298d	DMF and H2O
MOGYOZ	CO2Zn	C13H8O3|C15H16N6O	151	14.625|17.637	0.14	15.986	7.935|10.562|13.106	18.496	short diagonal	9.248	envelope	undulated	2	2D	4	sql	8-c (4,4)IV	(C29H24N6O6Zn)n n(C2H3N)	catena-((μ-N'',N'''-bis(1-(pyridin-4-yl)ethylidene)carbonohydrazide)-(μ-4,4'-oxydibenzoato)-zinc(II) acetonitrile solvate)	F.Afshariazar,A.Morsali	Cryst.Growth Des. (2019) 19, 4239.	http://dx.doi.org/10.1021/acs.cgd.9b00459	MeCN
MUPWOM	C2O4Cd	C12H10N	134	11.512	0	11.512	6.787|9.298	13.574	center	6.787	rhombic	flat	2	2D	4	sql	8-c (4,4)IV	(C26H20CdN2O4)n	catena-(bis(μ-3-(3-methylpyridin-4-yl)benzoato)-cadmium(II))	Xiao-Yun Tian, Hao-Long Zhou, Xue-Wen Zhang, Chao Wang, Dong-Dong Zhou, Xiao-Ming Chen, Jie-Peng Zhang	Inorg.Chem.Front. (2020) 7, 3424.	http://dx.doi.org/10.1039/D0QI00642D	—
MUYGOE	Zn	C11H13N2O3	101	9.177	0	9.177	5.297|7.494	10.594	center	5.297	rhombic	flat	2	2D	4	sql	8-c (4,4)IV	(C22H26N4O6Zn)n	catena-(bis(μ-glycyl-L-phenylalaninato)-zinc(II)).	A.Puskaric,I.Halasz,M.Gredicak,A.Palcic,J.Bronic	New J.Chem. (2016) 40, 4252.	http://dx.doi.org/10.1039/C5NJ03001C	—
NEJYIM	Zn	C14H9N2O2	133	11.352|11.524	0.24	11.435	7.769|8.334|8.451	15.536	short diagonal	7.768	envelope	undulated	2	2D	4	sql	8-c (4,4)IV	(C28H18N4O4Zn)n n(C3H7NO) n(H2O)	catena-(bis(μ-4-(benzimidazol-1-yl)benzoato)-zinc(II) dimethylformamide solvate monohydrate)	R.Mishra,M.Ahmad,M.R.Tripathi	Polyhedron (2013) 50, 22.	http://dx.doi.org/10.1016/j.poly.2012.09.062	DMF
NEYRAK	Ag	C16H8N2	121	14.126|14.848	0	14.126|14.848	8.224|11.932	16.448	center	8.224	parallelogram	flat	2	2D	4	sql	8-c (4,4)IV	(C32H16AgN4+)n n(F6P–)	catena-(bis(μ-3,3'-dicyanodiphenylacetylene)-silver(I) hexafluorophosphate)	K.A.Hirsch, S.R.Wilson, J.S.Moore,	Inorg.Chem. (1997) 36, 2960.	http://dx.doi.org/10.1021/ic970150j	PF6–
NEYREO	Ag	C16H8N2	120	14.098|14.913	0	14.098|14.913	8.262|11.93	16.524	center	8.262	parallelogram	flat	2	2D	4	sql	8-c (4,4)IV	(C32H16AgN4+)n n(AsF6–)	catena-(bis(μ-3,3'-dicyanodiphenylacetylene)-silver(I) hexafluoroarsenate)	K.A.Hirsch, S.R.Wilson, J.S.Moore	Inorg.Chem. (1997) 36, 2960.	http://dx.doi.org/10.1021/ic970150j	AsF6–
NEYRIS	Ag	C16H8N2	120	14.083|14.952	0	14.083|14.952	8.338|11.892	16.676	center	8.338	parallelogram	flat	2	2D	4	sql	8-c (4,4)IV	(C32H16AgN4+)n n(F6Sb–)	catena-(bis(μ-3,3'-icyanodiphenylacetylene)-silver(I) hexafluoroantimonate)	K.A.Hirsch, S.R.Wilson, J.S.Moore	Inorg.Chem. (1997) 36, 2960.	http://dx.doi.org/10.1021/ic970150j	SbF6–
NIBZIK	C2O4Cd	C14H11NO4|C20H18N4	150	15.087|17.372	1.14	16.183	5.98|14.456	30.121	long diagonal	15.0605	envelope	undulated	2	2D	4	sql	8-c (4,4)IV	(C36H29CdN5O8)n	catena-((μ-1,1'-((1,1'-biphenyl)-4,4'-diylbis(methylene))bis(1H-imidazole))-(μ-4-(4-(1-carboxylatoethoxy)phenoxy)-3-nitrobenzoato)-cadmium(II))	Peng Hao,Qi Huang,Lei Gu,Ying-Hui Yu,Dong-Sheng Ma	Polyhedron (2018) 149, 117.	http://dx.doi.org/10.1016/j.poly.2018.04.021	unaccounted void of 66 Å3 per formula unit
NIBZOQ	C2O4Co	C14H11NO4|C20H18N4	149	15.308|17.513	0.38	16.399	6.757|14.351|15.561	29.91	long diagonal	14.955	envelope	undulated	2	2D	4	sql	8-c (4,4)IV	(C36H29CoN5O8)n	catena-((μ-(R)-4-(4-(1-carboxylatoethoxy)phenoxy)-3-nitrobenzoato)-(μ-4,4'-bis((1H-imidazol-1-yl)methyl)biphenyl)-cobalt(II))	Peng Hao,Qi Huang,Lei Gu,Ying-Hui Yu,Dong-Sheng Ma	Polyhedron (2018) 149, 117.	http://dx.doi.org/10.1016/j.poly.2018.04.021	unaccounted void of 69 Å3 per formula unit
NIDFAJ	Zn	C24H15N2O4	133	16.871|16.97	0	16.871|16.97	11.583|12.334	23.166	center	11.583	parallelogram	flat	2	2D	4	sql	8-c (4,4)IV	(C48 H30 N4 O8 Zn)n	catena-((μ-4,4'-(4-(pyridinium-4-yl)pyridine-2,6-diyl)dibenzoato-O,O')-(μ-4,4'-(4-(pyridinium-4-yl)pyridine-2,6-diyl)dibenzoato-O,O,O')-zinc(II))	Shu-Yan Song, Xue-Zhi Song, Shu-Na Zhao, Chao Qin, Sheng-Qun Su, Min Zhu, Zhao-Min Hao, Hong-Jie Zhang	Dalton Trans. (2012) 41, 10412.	http://dx.doi.org/10.1039/C2DT30826F	—
NIHMUO	C2O4Pb	C11H8N	131	11.671	0	11.671	6.777|9.502	13.554	center	6.777	rhombic	flat	2	2D	4	sql	8-c (4,4)IV	(C24 H16 N2 O4 Pb)n	catena-(bis(μ-3-(pyridin-4-yl)benzoato)-lead(II))	Yi-Ping Guo, Hui Wang, Guo-Ting Li	Acta Crystallogr.,Sect.C:Cryst.Struct.Commun. (2013) 69, 872.	http://dx.doi.org/10.1107/S0108270113019045	—
OBELEN	Ag	C25H20N2O2|C27H24N2O2*	122	15.395|16.942	0	15.395|16.942	8.919|13.509	17.838	center	8.919	parallelogram	flat	2	2D	4	sql	8-c (4,4)IV	(C50H40AgN4O4+)n n(F6Sb–)	catena-(cis-bis(μ-(3-t-butyl-5-(hydroxy(3-cyanophenyl)methylene)cyclopenta-1,3-dien-1-yl)(3-cyanophenyl)methanone)-silver(I) hexafluoroantimonate)	Yu-Bin Dong, Peng Wang, Ru-Qi Huang, M.D.Smith	Inorg.Chem. (2004) 43, 4727.	http://dx.doi.org/10.1021/ic0495517	SbF6–
OBERUL	Zn	C8H6NO4	138	9.664|11.244	0	9.664|11.244	7.058|7.752	14.116	center	7.058	parallelogram	flat	2	2D	4	sql	8-c (4,4)IV	(C16H12N2O8Zn)n 2n(H2O)	catena-(bis(μ-(4-carboxylatopyridin-1-ium-1-yl)acetato)-zinc(II) dihydrate)	Ying-Qing Huang, Hai-Di Cheng, Yue Zhao	CSD Communication (2016).	http://dx.doi.org/10.5517/ccdc.csd.cc12vw71	H2O
ODIVIH	Co	C10H8N3O2	138	11.668	0	11.668	5.987|10.015	11.974	center	5.987	rhombic	flat	2	2D	4	sql	8-c (4,4)IV	(C20H16CoN6O4)n	catena-(bis(μ-4-(1H-1,2,4-triazol-1-ylmethyl)benzoato-N,O)-cobalt(II))	Xia-Xia Zhao, Jian-Ping Ma, Yu-Bin Dong, Ru-Qi Huang, Tianshu Lai	Cryst.Growth Des. (2007) 7, 1058.	http://dx.doi.org/10.1021/cg060583+	—
ODIVON	Zn	C10H8N3O2	138	11.667	0	11.667	5.98|10.018	11.96	center	5.98	rhombic	flat	2	2D	4	sql	8-c (4,4)IV	(C20H16N6O4Zn)n	catena-(bis(μ-4-(1H-1,2,4-triazol-1-ylmethyl)benzoato-N,O)-zinc(II))	Xia-Xia Zhao, Jian-Ping Ma, Yu-Bin Dong, Ru-Qi Huang, Tianshu Lai	Cryst.Growth Des. (2007) 7, 1058.	http://dx.doi.org/10.1021/cg060583+	—
ODIVON01	Zn	C10H8N3O2	138	11.675	0	11.675	5.994|10.019	11.988	center	5.994	rhombic	flat	2	2D	4	sql	8-c (4,4)IV	(C20H16N6O4Zn)n	catena-(bis(μ-4-(1H-1,2,4-triazol-1-ylmethyl)benzoato)-zinc(II))	Ruiqing Fan	CSD Communication (2016).	http://dx.doi.org/10.5517/ccdc.csd.cc13ff0z	—
OMASUS	C2O4Cd	C12H8O2S|C22H16N4O2*	145	14.548|21.833	0	14.548|21.833	12.539|13.672	25.078	center	12.539	parallelogram	flat	2	2D	4	sql	8-c (4,4)IV	(C34H26CdN4O8S)n n(H2O)	catena-((μ-1,1'-(ethane-1,2-diylbis(oxy-4,1-phenylene))bis(1H-imidazole))-(μ- 4,4'-sulfonyldibenzoato)-cadmium(II) monohydrate)	Jin-Ping Li, Jian-Zhong Fan, Duo-Zhi Wang	Wuji Huaxue Xuebao (2016) 32, 753.	http://dx.doi.org/10.11862/CJIC.2016.093	H2O
PABJAH	C2O4Cu	C13H12N4|C20H10N4	141	13.701|13.725|14.204|14.263	0.8	13.925|13.967	7.978|8.422|11.291|11.303	16.381	short diagonal	8.1905	envelope	undulated	2	2D	4	sql	8-c (4,4)IV	(C70H48Cu2N16O8)n 4n(H2O)	catena-(bis(μ-1,1'-(5-methyl-1,3-phenylene)bis(1H-imidazole))-bis(μ-2,2'-(1,3-phenylene)bis(1H-benzimidazole-5-carboxylato))-di-copper(II) tetrahydrate)	Chuanbin Fan, Cungang Xu, Ziao Zong, Xiaoyin Zhang, Bin Zhu, Lulu Wang, Xia Zhang, Shuangyu Bi, Yuhua Fan	J.Solid State Chem. (2020) 292, 121673.	http://dx.doi.org/10.1016/j.jssc.2020.121673	H2O
PAGFUB	C2O4Cd	C10H13N2O	94	9.319	0	9.319	5.341|7.637	10.682	center	5.341	rhombic	flat	2	2D	4	sql	8-c (4,4)IV	(C22H26CdN4O6)n	catena-(bis(μ-glycyl-L-phenylalaninato)-cadmium(II))	A.Puskaric, I.Halasz, M.Gredicak, Ana Palcic, J.Bronic	New J.Chem. (2016) 40, 4252.	http://dx.doi.org/10.1039/C5NJ03001C	—
PETVUH	C2O4Cd	C13H14N2|C7H6	136	10.719|12.306	1.8	11.346	7.752|7.856|8.944	16.704	long diagonal	8.352	envelope	undulated	2	2D	4	sql	8-c (4,4)IV	(C22H20CdN2O4)n	catena-((μ-4-(carboxylatomethyl)benzoato)-(μ--4,4'-propane-1,3-diyldipyridine)-cadmium(II))	Guang-Zhen Liu,Xiao-Dong Li,Xiao-Ling Li,Li-Ya Wang	CrystEngComm (2013) 15, 2428.	http://dx.doi.org/10.1039/c3ce26781d	—
PEZXUP	C4O8Cd	C30H32O6*	122	23.034	0	23.034	8.672|21.339	17.344	center	8.672	rhombic	flat	2	2D	4	sql	8-c (4,4)IV	1.75n(C2H8N+) 0.25n(Na+) (C64H64CdO182–)n n(H2O)	catena-(sodium dimethylammonium bis(μ-2-hydroxymethyl-4,6-bis(2'-methoxyl-4'-(2-carboxylatoethen-1-yl)-1,3,5-mesitylene)-cadmium(II) monohydrate)	Hong-Mei Zhang, Jin Yang, Yuan-Chun He, Jian-Fang Ma	Chem.Asian J. (2013) 8, 2787.	http://dx.doi.org/10.1002/asia.201300615	Na+, NH2Me2+ and H2O
PIMJUS	C14H24N4O14Cd3*	C24H16N2O4	139	21.799	0	21.799	15.18|15.645	30.36	center	15.18	rhombic	flat	2	2D	4	sql	8-c (4,4)IV	(C58H50Cd3N6O22)n	catena-(bis(μ-4,4'-(3,5,9,11-tetraoxo-4,10-diazatetracyclo[5.5.2.02,6.08,12]tetradec-13-ene-4,10-diyl)dibenzoato)-bis(μ-oxo)-bis(N,N-dimethylformamide)-diaqua-tri-cadmium(II) unknown solvate)	Huimin Li, Jingmin Zhou, Wei Shi, Xuejing Zhang, Zhenjie Zhang, Meng Zhang, Peng Cheng	CrystEngComm (2014) 16, 834.	http://dx.doi.org/10.1039/C3CE41805G	unknown solvent
POLFUT	Zn	C18H14N4O|C7H10O4	137	10.15|16.37	2.5	12.272	5.186|9.996|10.458	15.415	short diagonal	7.7075	envelope	undulated	2	2D	4	sql	8-c (4,4)IV	(C25H24N4O5Zn)n n(H2O)	catena-((μ-1,1'-(oxydi-4,1-phenylene)bis(1H-imidazole))-(μ-pimelato)-zinc(II) monohydrate)	Jin-Song Hu,Xu-Jiao Zhang,Xiao-Wei Cai,Lin-Xiao Sun,Wen-Hao Zhang,Jian-Jun Shi,Xiao-Mei Zhang,Hong-Long Xing	Wuji Huaxue Xuebao(Chin.)(Chin.J.Inorg.Chem.) (2014) 30, 654.	http://dx.doi.org/10.11862/CJIC.2014.014	H2O
QAMHEU	Zn	C14H8O6S|C24H19N5	132	13.301|16.914	4	14.478	9.451|10.195|12.591	22.428	long diagonal	7.476	envelope	undulated	3	2D	8	8L5	12L14	(C38H27N5O6SZn)n	catena-((μ-4-((4-carboxylatophenyl)sulfonyl)benzoato)-(μ-4-(1H-imidazol-1-yl)-N-(4-(1H-imidazol-1-yl)phenyl)-N-phenylaniline)-zinc(II))	Xianmin Guo,Yongnian Yan,Huadong Guo,Yanjuan Qi,Chunming Liu	CrystEngComm (2016) 18, 2546.	http://dx.doi.org/10.1039/C6CE00102E	—
QAYCAX	C28H20N16Cd2I2	C10H8N2CdI2	114	16.564	0	16.564	8.428|14.26	16.856	center	8.428	rhombic	flat	2	2D	4	sql	8-c (4,4)IV	(C24H17Cd2I3N10)n	catena-((μ-iodo)-(μ-2-(5-(pyridin-3-yl)-1H-1,2,4-triazol-3-yl)pyridine)-(μ-5-(pyridin-2-yl)-3-(pyridin-3-yl)-1,2,4-triazolato)-diiodo-di-cadmium(II))	Dong-Wei Shi, Hai-Ye Li, Jing-Bin Lei, Fu-Ping Huang, Xiao-Huan Qin, Qing Yu, He-Dong Bian	J.Coord.Chem. (2015) 68, 1957.	http://dx.doi.org/10.1080/00958972.2015.1040401	—
QEYZAY	Zn	C11H12N2O3	101	8.786	0	8.786	5.201|7.081	10.402	center	5.201	rhombic	flat	2	2D	4	sql	8-c (4,4)IV	(C22H26N4O8Zn)n	catena-(bis(μ-glycyl-L-tyrosinato)-zinc(II))	J.Navarro-Sanchez,I.Mullor-Ruiz,C.Popescu,D.Santamaria-Perez,A.Segura,D.Errandonea,J.Gonzalez-Platas,C.Marti-Gastaldo	Dalton Trans. (2018) 47, 10654.	http://dx.doi.org/10.1039/C8DT01765D	—
QEYZAY01	Zn	C11H13N2O4	97	9.204	0	9.204	5.417|7.442	10.834	center	5.417	rhombic	flat	2	2D	4	sql	8-c (4,4)IV	(C22H26N4O8Zn)n	catena-(bis(μ-glycyl-L-tyrosinato)-zinc(II))	J.Navarro-Sanchez, I.Mullor-Ruiz, C.Popescu, D.Santamaria-Perez, A.Segura, D.Errandonea, J.Gonzalez-Platas, C.Marti-Gastaldo	Dalton Trans. (2018) 47, 10654.	http://dx.doi.org/10.1039/C8DT01765D	—
QEYZAY02	Zn	C11H13N2O4	97	9.155	0	9.155	5.375|7.411	10.75	center	5.375	rhombic	flat	2	2D	4	sql	8-c (4,4)IV	(C22H26N4O8Zn)n	catena-(bis(μ-glycyl-L-tyrosinato)-zinc(II))	J.Navarro-Sanchez, I.Mullor-Ruiz, C.Popescu, D.Santamaria-Perez, A.Segura, D.Errandonea, J.Gonzalez-Platas, C.Marti-Gastaldo	Dalton Trans. (2018) 47, 10654.	http://dx.doi.org/10.1039/C8DT01765D	—
QEYZAY03	Zn	C11H13N2O4	96	9.068	0	9.068	5.312|7.349	10.624	center	5.312	rhombic	flat	2	2D	4	sql	8-c (4,4)IV	(C22H26N4O8Zn)n	catena-(bis(μ-glycyl-L-tyrosinato)-zinc(II))	J.Navarro-Sanchez, I.Mullor-Ruiz, C.Popescu, D.Santamaria-Perez, A.Segura, D.Errandonea, J.Gonzalez-Platas, C.Marti-Gastaldo	Dalton Trans. (2018) 47, 10654.	http://dx.doi.org/10.1039/C8DT01765D	—
QEYZAY04	Zn	C11H13N2O4	96	8.966	0	8.966	5.246|7.271	10.492	center	5.246	rhombic	flat	2	2D	4	sql	8-c (4,4)IV	(C22H26N4O8Zn)n	catena-(bis(μ-glycyl-L-tyrosinato)-zinc(II))	J.Navarro-Sanchez, I.Mullor-Ruiz, C.Popescu, D.Santamaria-Perez, A.Segura, D.Errandonea, J.Gonzalez-Platas, C.Marti-Gastaldo	Dalton Trans. (2018) 47, 10654.	http://dx.doi.org/10.1039/C8DT01765D	—
QEYZAY05	Zn	C11H13N2O4	98	9.286	0	9.286	5.488|7.491	10.976	center	5.488	rhombic	flat	2	2D	4	sql	8-c (4,4)IV	(C22H26N4O8Zn)n	catena-(bis(μ-glycyl-L-tyrosinato)-zinc(II))	J.Navarro-Sanchez, I.Mullor-Ruiz, C.Popescu, D.Santamaria-Perez, A.Segura, D.Errandonea, J.Gonzalez-Platas, C.Marti-Gastaldo	Dalton Trans. (2018) 47, 10654.	http://dx.doi.org/10.1039/C8DT01765D	—
QEYZAY06	Zn	C11H13N2O4	96	8.871	0	8.871	5.215|7.176	10.43	center	5.215	rhombic	flat	2	2D	4	sql	8-c (4,4)IV	(C22H26N4O8Zn)n	catena-(bis(μ-glycyl-L-tyrosinato)-zinc(II))	J.Navarro-Sanchez, I.Mullor-Ruiz, C.Popescu, D.Santamaria-Perez, A.Segura, D.Errandonea, J.Gonzalez-Platas, C.Marti-Gastaldo	Dalton Trans. (2018) 47, 10654.	http://dx.doi.org/10.1039/C8DT01765D	—
QIKBOE	C2H2O5Cd	C19H24N4O2|C4H2S	144	10.565|17.373	0.23	13.402	6.542|10.14|11.743|11.783	18.284	short diagonal	9.142	envelope	undulated	2	2D	4	sql	8-c (4,4)IV	(C25H28CdN4O7S)n 3(H2O)	catena-((μ-N,N'-(heptane-1,7-diyl)di(pyridine-3-carboxamide))-(μ-thiophene-2,5-dicarboxylato)-aqua-cadmium(II) trihydrate)	J.J.Przybyla,R.L.LaDuca	Inorg.Chim.Acta (2019) 486, 314.	http://dx.doi.org/10.1016/j.ica.2018.10.039	H2O
QUKKEN	C2O4Cd	C18H12O2|C18H14N6	150	19.113|19.312	0.26	19.21	13.414|13.683|13.822	27.504	long diagonal	6.876	envelope	undulated	4	2D	12	12L2	16L1	(C38H26CdN6O6)n	catena-((μ-bis(4-(imidazolyl)phenyl)diazene-N,N')-(μ-1,3-bis(4'-carboxylatophenoxy)benzene)-cadmium(II))	S.Neogi,M.K.Sharma,M.C.Das,P.K.Bharadwaj	Polyhedron (2009) 28, 3923.	http://dx.doi.org/10.1016/j.poly.2009.09.005	—
QUKKIR	C2O5Cd	C12H8O|C24H10N8*	148	14.293|19.581	0	14.293|19.581	11.855|12.382	23.71	center	11.855	parallelogram	flat	2	2D	4	sql	8-c (4,4)IV	(C32 H22 Cd N6 O5)n,n(H2 O)	catena-((μ-bis(4-(imidazolyl)phenyl)diazene-N,N')-(μ-4,4'-oxybis(benzoato))-cadmium(II) monohydrate)	S.Neogi, M.K.Sharma, M.C.Das, P.K.Bharadwaj	Polyhedron (2009) 28, 3923.	http://dx.doi.org/10.1016/j.poly.2009.09.005	H2O
RASDOH	CH2O3Co	C18H14N4|C23H16O8	155	16.826|19.83	0	16.826|19.83	13.003	26.006	center	13.003	rectangle	flat	2	2D	4	sql	8-c (4,4)IV	(C42H32CoN4O11)n	catena-((μ-1,1'-((1,1'-biphenyl)-4,4'-diyl)bis(1H-imidazole))-(μ-dihydrogen 5,5'-(1,3-phenylenebis(methyleneoxy))bis(benzene-1,3-dicarboxylato))-aqua-cobalt(II))	Zheng Zhu, Lian-sheng Cui, Chuan-bin Fan, Xiao-yin Zhang, Dong-mei Zhang, Fan Jin, Yu-hua Fan	Polyhedron (2017) 133, 374.	http://dx.doi.org/10.1016/j.poly.2017.05.034	—
RASROV	CH2O3Ni	C18H14N4|C23H16O8	155	16.838|19.679	0	16.838|19.679	12.882|13.017	25.764	center	12.882	parallelogram	flat	2	2D	4	sql	8-c (4,4)IV	(C42H32N4NiO11)n 0.5n(H2O)	catena-((μ-1,1'-((1,1'-biphenyl)-4,4'-diyl)bis(1H-imidazole))-(μ-dihydrogen 5,5'-(1,3-phenylenebis(methyleneoxy))bis(benzene-1,3-dicarboxylato))-aqua-nickel(II) hemihydrate)	Zheng Zhu, Lian-sheng Cui, Chuan-bin Fan, Xiao-yin Zhang, Dong-mei Zhang, Fan Jin, Yu-hua Fan	Polyhedron (2017) 133, 374.	http://dx.doi.org/10.1016/j.poly.2017.05.034	H2O
REQNOT	N3O9La	C18H24O6P2	166	17.934|18.63	0.45	18.274	11.73|13.791|14.244	28.032	long diagonal	14.016	envelope	undulated	2	2D	4	sql	8-c (4,4)IV	(C36H48LaN3O21P4)n	catena-(bis(μ-tetramethyl((1,1'-biphenyl)-4,4'-diylbis(methylene))bis(phosphonate))-trinitrato-lanthanum(III))	K.Krekic,E.Kakel,D.Klintuch,Dana Blo,R.Pietschnig	Z.Anorg.Allg.Chem. (2018) 644, 149.	http://dx.doi.org/10.1002/zaac.201700424	—
REQNUZ	N3O9Ce	C18H24O6P2	167	18.157|18.76	0.41	18.452	11.781|14.01|14.402	28.409	long diagonal	14.2045	envelope	undulated	2	2D	4	sql	8-c (4,4)IV	(C36H48CeN3O21P4)n	catena-(bis(μ-tetramethyl((1,1'-biphenyl)-4,4'-diylbis(methylene))bis(phosphonate))-trinitrato-cerium(III))	K.Krekic,E.Kakel,D.Klintuch,Dana Blo,R.Pietschnig	Z.Anorg.Allg.Chem. (2018) 644, 149.	http://dx.doi.org/10.1002/zaac.201700424	—
RESWOD	C2O4Ni	C12H8O|C17H22N4O2*	152	14.701|19.358	0	16.891	10.88|11.504|14.06	24.94	long diagonal	12.47	kite	flat	2	2D	4	sql	8-c (4,4)IV	(C30H26N4NiO7)n n(H2 O)	catena-((μ-4,4'-oxydibenzoato)-(μ-N,N'-bis(pyridin-4-yl)hexanediamide)-nickel(II) monohydrate)	Yu-Hung Liao, Wayne Hsu, Chun-Chuen Yang, Can-Yu Wu, J.-D.Chen, Ju-Chun Wang	CrystEngComm (2013) 15, 3974.	http://dx.doi.org/10.1039/c3ce26928k	H2O
ROMPAN	O40PZn4Mo12	C33H20O6F12*	133	28.291	0	28.291	13.278|24.981	49.962	long diagonal	16.654	rhombic	flat	3	2D	8	8L5	12L14	5n(C16H36N+) (C124H89F24Mo24O104P2Zn85–)n	catena-(pentakis(tetra-n-butylammonium) tetrakis(μ-4,4'-((1,1,1,3,3,3-hexafluoropropane-2,2-diyl)bis((4,1-phenylene)oxymethylene))dibenzoato)-nonakis(μ-hydroxo)-nonatriacontakis(μ-oxo)-bis(μ-phosphato)-tetracosaoxo-hexadeca-molybdenum(V)-octa-molybdenum(VI)-octa-zinc(II))	Xiao-Xin Li, Jiang Liu, Lei Zhang, Long-Zhang Dong, Zhi-Feng Xin, Shun-Li Li, Xue-Qing Huang-Fu, Kai Huang, Ya-Qian Lan	ACS Applied Materials and Interfaces (2019) 11, 25790.	http://dx.doi.org/10.1021/acsami.9b03861	NBu4+
RUBDIC	Zn	C11H9N2O2	143	11.747|11.796	0.07	11.771	7.457|9.092|9.124	18.216	long diagonal	9.108	envelope	undulated	2	2D	4	sql	8-c (4,4)IV	(C22H18N4O4Zn)n n(H2O)	catena-(bis(μ-4-(imidazol-1-ylmethyl)benzoato)-zinc(II) monohydrate)	Yan-Hong Xu,Ya-Qian Lan,Xin-Long Wang,Hong-Ying Zang,Kui-Zhan Shao,Yi Liao,Zhong-Min Su	Solid State Sciences (2009) 11, 635.	http://dx.doi.org/10.1016/j.solidstatesciences.2008.10.008	H2O
RUVBAN	Zn	C9H6N3O2	143	11.382	0	11.382	7.862|8.231|	15.724	center	7.862	rhombic	flat	2	2D	4	sql	8-c (4,4)IV	(C18H12N6O4Zn)n	catena-(bis(μ-4-(4H-1,2,4-triazol-4-yl)benzoato)-zinc(II))	Li-Bo Yang, Hong-Can Wang, Xiao-Dan Fang, Si-Jin Chen, Quan-Qing Xu, Ai-Xin Zhu, Zhi Yang	CrystEngComm (2016) 18, 130.	http://dx.doi.org/10.1039/C5CE01815C	—
SICCEO	CO2Zn	C16H12N2|C4H6O2	131	8.622|13.168	1.28	10.58	6.145|7.442|9.343|9.495|11.819	15.433	long diagonal	7.7165	envelope	undulated	2	2D	4	sql	8-c (4,4)IV	(C21H18N2O4Zn)n	catena-((μ-glutarato)-(μ-4,4'-(1,3-phenylene)dipyridine)-zinc(II))	Jin-Song Hu,Zhang Lei,Hong-Long Xing,Xiao-Mei Zhang,Jian-Jun Shi,Jie He	Mendeleev Communications (2013) 23, 229.	http://dx.doi.org/10.1016/j.mencom.2013.07.018	—
SIFJID	C4H4O11Zn4	C29H16N3O4S3	143	18.534	0	18.534	12.115|14.026	24.23	center	12.115	rhombic	flat	2	2D	4	sql	8-c (4,4)IV	(C48H28N6O15S6Zn4)n	catena-(bis(μ-4,4',4''-(1,3,5-triazine-2,4,6-triyltrisulfanediyl)tribenzoato)-(μ-oxido)-bis(μ-aqua)-tetra-zinc(II) unknown solvate)	Guanfeng Ji, Xuechuan Gao, Tianxiang Zheng, Weihua Guan, Houting Liu, Zhiliang Liu	Inorg.Chem. (2018) 57, 10525.	http://dx.doi.org/10.1021/acs.inorgchem.8b00313	unknown solvent
SOBREI	Zn	C17H17N2O2	146	15.321	0	15.321	10.747|10.92	21.84	long diagonal	7.28	rhombic	flat	3	2D	8	8L5	12L14	(C34H34N4O4Zn)n	catena-(bis(μ-3-(4-(pyridin-4-yl)piperidin-1-yl)benzoato)-zinc(II))	Jie Zhang, Jianming Geng, Guiming Zheng, Jingcao Dai, Zhiyong Fu	Chem.Commun. (2014) 50, 7326.	http://dx.doi.org/10.1039/C4CC02584A	—
SOBREI01	C2O4Zn	C16H17N2	142	15.307	0	15.307	10.748|10.898	21.796	long diagonal	7.26533	rhombic	flat	3	2D	8	8L5	12L14	(C34H34N4O4Zn)n	catena-(bis(μ-3-(4-(pyridin-4-yl)piperidin-1-yl)benzoato)-zinc(II))	Jie Zhang, Jianming Geng, Guiming Zheng, Jingcao Dai, Zhiyong Fu	Chem.Commun. (2014) 50, 7326.	http://dx.doi.org/10.1039/C4CC02584A	—
TUMBIO	Ag	C18H26N4O4Cr	139	12.444	0	12.444	7.3|10.078	14.6	center	7.3	rhombic	flat	2	2D	4	sql	8-c (4,4)IV	(C36H52AgCr2N8O83+)n 3n(F6P–) 8n(H2O)	catena-(bis(cyclohexane-1,2-diamine)-tetrakis(3-cyano-4-oxopent-2-en-2-olato)-di-chromium(III)-silver(I) tris(hexafluorophosphate) octahydrate)	Ai Wang, C.Merkens, Ulli Englert	CrystEngComm (2015) 17, 4293.	http://dx.doi.org/10.1039/C5CE00586H	PF6– and H2O
UGIGOI	Zn	C12H11N2O2	139	11.46|12.159	0	11.46|12.159	6.874|9.609	13.748	center	6.874	parallelogram	flat	2	2D	4	sql	8-c (4,4)IV	(C24H22N4O4Zn)n	catena-(bis(μ-4-((2-methyl-1H-imidazol-1-yl)methyl)benzoato)-zinc(II))	Wei-Ping Wu, Ping Liu, Yu-Tong Liang, Lin Cui, Zheng-Ping Xi, Yao-Yu Wang	J.Solid State Chem. (2015) 228, 124.	http://dx.doi.org/10.1016/j.jssc.2015.04.009	—
UGIGUO	Zn	C12H11N2O2	139	11.45|12.129	0	11.45|12.129	6.869|9.587	13.738	center	6.869	parallelogram	flat	2	2D	4	sql	8-c (4,4)IV	(C24H22N4O4Zn)n	catena-(bis(μ-4-((2-methyl-1H-imidazol-1-yl)methyl)benzoato)-zinc(II))	Wei-Ping Wu, Ping Liu, Yu-Tong Liang, Lin Cui, Zheng-Ping Xi, Yao-Yu Wang	J.Solid State Chem. (2015) 228, 124.	http://dx.doi.org/10.1016/j.jssc.2015.04.009	—
UNAGEX	Zn	C7H10N6|C9H4O6	123	9.264|9.534	0.61	9.379	6.31|6.861|7.043	13.89	long diagonal	6.945	envelope	undulated	2	2D	4	sql	8-c (4,4)IV	(C16H14N6O6Zn)n n(H2O)	catena-((μ-(R)-4-(1-(4H-1,2,4-triazol-4-yl)propan-2-yl)-4H-1,2,4-triazole)-(μ-hydrogen benzene-1,3,5-tricarboxylato)-zinc(II) monohydrate)	Anas Tahli,A.-C.Chamayou,Umit Koc,R.Bruckner,R.F.M.Elshaarawy,Christian Heering,C.Janiak	Inorg.Chim.Acta (2016) 450, 190.	http://dx.doi.org/10.1016/j.ica.2016.05.042	H2O
UNAGIB	Zn	C7H10N6|C9H4O6	123	9.311|9.523	0.56	9.4	6.364|6.858|7.002	13.849	long diagonal	6.9245	envelope	undulated	2	2D	4	sql	8-c (4,4)IV	(C16H14N6O6Zn)n n(H2O)	catena-((μ-(S)-4-(1-(4H-1,2,4-triazol-4-yl)propan-2-yl)-4H-1,2,4-triazole)-(μ-hydrogen benzene-1,3,5-tricarboxylato)-zinc(II) monohydrate)	Anas Tahli,A.-C.Chamayou,Umit Koc,R.Bruckner,R.F.M.Elshaarawy,Christian Heering,C.Janiak	Inorg.Chim.Acta (2016) 450, 190.	http://dx.doi.org/10.1016/j.ica.2016.05.042	H2O
UXOVEK	C2O4Ni	C10H12N4|C6H10	130	8.705|13.199	0.17	10.838	6.204|7.625|10.361	17.985	long diagonal	8.9925	envelope	undulated	2	2D	4	sql	8-c (4,4)IV	(C18H22N4NiO4)n	catena-((μ-cyclohexane-1,4-dicarboxylato)-(μ-1,4-bis(1H-imidazol-1-yl)but-2-ene)-nickel(II))	Wei Li,Xuan Sun,Jian Suo,Yanpeng Xing,Daguang Wang	Z.Kristallogr.-New Cryst.Struct. (2016) 231, 1015.	http://dx.doi.org/10.1515/ncrs-2016-0023	—
UYUKOP	Zn	C8H6N5O2	150	12.096|12.434	0	12.096|12.434	8.653|8.694	17.306	center	8.653	parallelogram	flat	2	2D	4	sql	8-c (4,4)IV	(C16H12N10O4Zn)n 2n(H2O)	catena-(bis(μ-5-(1-(carboxylatomethyl)pyridinium-4-yl)tetrazolato)-zinc(II) dihydrate)	Guo-xi Wang, Yan-wei Zhang	Inorg.Chim.Acta (2011) 376, 212.	http://dx.doi.org/10.1016/j.ica.2011.06.016	H2O
VABNIW	Ag	C8H12N2*	139	11.781	0	11.781	7.871|8.766	17.532	long diagonal	5.844	rhombic	flat	3	2D	8	8L5	12L14	(C14H20AgN4+)n n(F6Sb–)	catena-(bis(μ-1,7-heptanedinitrile-N,N')-silver(I) hexafluoroantimonate)	L.Carlucci, G.Ciani, D.M.Proserpio, S.Rizzato	CrystEngComm (2002) 4, 413.	http://dx.doi.org/10.1039/b202093a	SbF6–
VABNOC	Ag	C7H10N2	140	11.913	0	11.913	7.552|9.213	18.426	long diagonal	6.142	rhombic	flat	3	2D	8	8L5	12L14	(C14H20AgN4+)n n(CF3O3S–)	catena-(bis(μ-1,7-heptanedinitrile-N,N')-silver(I) trifluoromethanesulfonate)	L.Carlucci, G.Ciani, D.M.Proserpio, S.Rizzato	CrystEngComm (2002) 4, 413.	http://dx.doi.org/10.1039/b202093a	CF3SO3–
VEYXAZ	Cu4I4	C10H8N2S	128	13.111	0	13.111	8.004|10.385	16.008	center	8.004	rhombic	flat	2	2D	4	sql	8-c (4,4)IV	(C10H8Cu2I2N2S)n	catena-(bis(μ3-Iodo)-(μ-4,4'-thiodipyridine-N,N')-di-copper(I))	Jing Wang, Shao-Liang Zheng, Sheng Hu, Yue-Hua Zhang, Ming-Liang Tong	Inorg.Chem. (2007) 46, 795.	http://dx.doi.org/10.1021/ic0616028	—
VIQCOP	Zn	C14H9N4O2	138	14.197	0	14.197	10.039	20.078	center	10.039	square	flat	2	2D	4	sql	8-c (4,4)IV	(C28H18N8O4Zn)n 2n(H2O)	catena-(bis(μ-3-(3-(pyridin-4-yl)-1H-1,2,4-triazol-5-yl)benzoato)-zinc(II) dihydrate)	Yun Gong, Miao Miao Zhang, Wei Hua, Jun Liang Sun, Hui Fang Shi, Peng Gang Jiang, Fu Hui Liao, Jian Hua Lin	Dalton Trans. (2014) 43, 145.	http://dx.doi.org/10.1039/C3DT51736E	H2O
VIQDAC	CH2O3Co	C13H9N4|C14H9N4O2	146	14.017|15.156	0	14.017|15.156	10.322	20.644	center	10.322	rectangle	flat	2	2D	4	sql	8-c (4,4)IV	(C28H20CoN8O5)n n(H2O)	catena-((μ-3-(3-(pyridin-4-yl)-1H-1,2,4-triazol-5-yl)benzoato-N,O,O')-(μ-3-(3-(pyridin-4-yl)-1H-1,2,4-triazol-5-yl)benzoato-N,O)-aqua-cobalt(II) monohydrate)	Yun Gong, Miao Miao Zhang, Wei Hua, Jun Liang Sun, Hui Fang Shi, Peng Gang Jiang, Fu Hui Liao, Jian Hua Lin	Dalton Trans. (2014) 43, 145.	http://dx.doi.org/10.1039/C3DT51736E	H2O
VIQDEG	CH2O3Ni	C13H9N4|C14H9N4O2	146	13.96|15.089	0	13.96|15.089	10.278	20.556	center	10.278	rectangle	flat	2	2D	4	sql	8-c (4,4)IV	(C28H20N8NiO5)n n(H2O)	catena-((μ-3-(3-(pyridin-4-yl)-1H-1,2,4-triazol-5-yl)benzoato-N,O,O')-(μ-3-(3-(pyridin-4-yl)-1H-1,2,4-triazol-5-yl)benzoato-N,O)-aqua-nickel(II) monohydrate)	Yun Gong, Miao Miao Zhang, Wei Hua, Jun Liang Sun, Hui Fang Shi, Peng Gang Jiang, Fu Hui Liao, Jian Hua Lin	Dalton Trans. (2014) 43, 145.	http://dx.doi.org/10.1039/C3DT51736E	H2O
VOGPOY	Cu	C16H18N4O2	144	14.831	0	14.831	9.555|11.342	19.11	center	9.555	rhombic	flat	2	2D	4	sql	8-c (4,4)IV	(C32H40CuN8O62+)n 2n(ClO4–) 2n(H2O)	catena-(bis(μ-N,N'-di(pyridin-3-yl)hexanediamide)-diaqua-copper(II) bis(perchlorate) dihydrate)	K.Suman, F.Baig, R.kant, V.K.Gupta, S.Mandal, M.Sarkar	RSC Advances (2014) 4, 36451.	http://dx.doi.org/10.1039/C4RA04166F	ClO4– and H2O
VOPSUQ	Zn	C16H11O6F|C20H18N4	151	15.432|17.615	0.18	16.515	6.562|14.574|15.763	30.336	long diagonal	15.168	envelope	undulated	2	2D	4	sql	8-c (4,4)IV	(C36H29FN4O6Zn)n 0.5n(CH4O)	catena-((μ-1,1'-(biphenyl-4,4'-diylbis(methylene))bis(1H-imidazole))-(μ-4-(4-(1-carboxyethoxy)phenoxy)-3-fluorobenzoato)-zinc(II) methanol solvate)	Han-Tao Ye,Chang-Yue Ren,Guang-Feng Hou,Ying-Hui Yu,Xin Xu,Jin-Sheng Gao,Peng-Fei Yan,Seik-Weng Ng	Cryst.Growth Des. (2014) 14, 3309.	http://dx.doi.org/10.1021/cg500197v	MeOH
VOPTIF	Zn	C14H14N4|C16H11O6F	147	12.593|14.379	1.56	13.379	7.966|10.263|11.376	21.583	long diagonal	10.7915	envelope	undulated	2	2D	4	sql	8-c (4,4)IV	(C30H25FN4O6Zn)n 0.5n(CH4O) 0.5n(H2O)	catena-((μ-4-(4-(1-carboxyethoxy)phenoxy)-3-fluorobenzoato)-(μ-1,1'-(1,4-phenylenebis(methylene))bis(1H-imidazole))-zinc(II) methanol solvate hemihydrate)	Han-Tao Ye,Chang-Yue Ren,Guang-Feng Hou,Ying-Hui Yu,Xin Xu,Jin-Sheng Gao,Peng-Fei Yan,Seik-Weng Ng	Cryst.Growth Des. (2014) 14, 3309.	http://dx.doi.org/10.1021/cg500197v	MeOH and H2O
VOTFUI	C38H28N4	C10H2O4F12Co	100	16.273	0	16.273	11.507	23.014	center	11.507	square	flat	2	2D	4	sql	8-c (4,4)IV	(C58H32Co2F24N4O8)n	catena-((μ-4,4',4'',4'''-(tricyclo[3.3.1.13,7]decane-1,3,5,7-tetrayl)tetrabenzonitrile)-tetrakis(1,1,1,5,5,5-hexafluoroacetylacetonato)-di-cobalt(II) unknown solvate)	T.Mocanu, Lidia Pop, N.D.Hadade, S.Shova, L.Sorace, I.Grosu, M.Andruh	Eur.J.Inorg.Chem. (2019) 2019, 5025.	http://dx.doi.org/10.1002/ejic.201901167	unknown solvent
VURQEF	Zn	C10H7N2O2	143	11.362	0	11.362	8.034	16.068	center	8.034	square	flat	2	2D	4	sql	8-c (4,4)IV	(C20H14N4O4Zn)n	catena-(bis(μ-4-imidazolylbenzoato)-zinc(II))	ZhengShuai Bai, ShuiSheng Chen, ZhengHua Zhang, ManSheng Chen, GuangXiang Liu, WeiYin Sun	Sci.China,Ser.B:Chem. (2009) 52, 459.	http://dx.doi.org/10.1007/s11426-009-0044-9	—
VURQEF01	Zn	C10H7N2O2	143	11.409	0	11.409	8.067	16.134	center	8.067	square	flat	2	2D	4	sql	8-c (4,4)IV	(C20H14N4O4Zn)n	catena-(bis(μ-4-imidazolylbenzoato)-zinc(II))	Ke-Hui Cui, Shi-Yan Yao, Hai-Qin Li, Yan-Tao Li, Hai-Ping Zhao, Chun-Jie Jiang, Yun-Qi Tian	CrystEngComm (2011) 13, 3432.	http://dx.doi.org/10.1039/c0ce00789g	—
VURQEF02	Zn	C10H7N2O2	143	11.41	0	11.41	8.068	16.136	center	8.068	square	flat	2	2D	4	sql	8-c (4,4)IV	(C20H14N4O4Zn)n	catena-(bis(μ-4-imidazolylbenzoato)-zinc(II))	Ruiqing Fan	CSD Communication (2016).	http://dx.doi.org/10.5517/ccdc.csd.cc13z6jt	—
WANSOU	Cu4I4	C14H14N4O2	134	15.106	0	15.106	10.012|11.312	20.024	center	10.012	rhombic	flat	2	2D	4	sql	8-c (4,4)IV	(C14H14Cu2I2N4O2)n	catena-(bis(μ3-Iodo)-(μ-1,2-bis(3-pyridylcarbonylamino)ethane-N,N')-di-copper(II))	M.Sarkar, K.Biradha	Chem.Commun. (2005) 2229.	http://dx.doi.org/10.1039/b500666j	—
WIHPEK	C2O4Co	C13H14N2|C7H6	138	10.521|12.16	1.84	11.164	7.498|7.839|8.946	16.683	long diagonal	8.3415	envelope	undulated	2	2D	4	sql	8-c (4,4)IV	(C22H20CoN2O4)n	catena-((μ-4,4'-propane-1,3-diyldipyridine)-(μ-4-(carboxylatomethyl)benzoato)-cobalt(II))	Guang-Zhen Liu,Xiao-Dong Li,Ling-Yun Xin,Xiao-Ling Li,Li-Ya Wang	J.Solid State Chem. (2013) 203, 106.	http://dx.doi.org/10.1016/j.jssc.2013.03.053	—
WINLOX	C4H8O12Cd2	C12H14N2O2	146	15.53|15.839	10.23	11.883	9.091|10.419|10.649	18.414	long diagonal	9.207	envelope	undulated	2	2D	4	sql	8-c (4,4)IV	(C28H36Cd2N4O16)n 3n(H2O)	catena-(bis(μ-2,2'-(benzene-1,4-diylbis(carbonylimino))dipropanoato)-tetra-aqua-di-cadmium(II) trihydrate)	H.-T.Zhang,X.-L.Wang	Acta Crystallogr.,Sect.C:Cryst.Struct.Chem. (2018) 74, 1434.	http://dx.doi.org/10.1107/S2053229618013967	H2O
WIVCAI	H4O2Co	C9H9N2O3	153	12.245|12.272	2.64	11.972	7.557|9.462|9.479	18.756	long diagonal	9.378	envelope	undulated	2	2D	4	sql	8-c (4,4)IV	(C18H22CoN4O8)n	catena-(bis(μ-N-(pyridine-4-carbonyl)alaninato)-diaqua-cobalt(II))	Xu Liu,Wei-Xiao Guo,Xiao-Lu Hu,Yuan-Yuan Wang,Qi Yue,En-Qing Gao	J.Solid State Chem. (2019) 273, 53.	http://dx.doi.org/10.1016/j.jssc.2019.02.024	—
WOTQOO	C2O4Cd	C12H7N|C13H14N2	137	11.211|14.347	0.73	12.684	8.345|8.582|10.664	19.232	long diagonal	9.616	envelope	undulated	2	2D	4	sql	8-c (4,4)IV	(C27H21CdN3O4)n n(H2O)	catena-((μ-9H-carbazole-3,6-dicarboxylato)-(μ-4,4'-(propane-1,3-diyl)dipyridine)-cadmium(II) monohydrate)	Daguang Wang, Wei Li, Yabin Sun	Z.Kristallogr.-New Cryst.Struct. (2019) 234, 1169.	http://dx.doi.org/10.1515/ncrs-2019-0307	H2O
XOFYUM	C2O4Zn	C21H16N	150	20.126	0	20.126	12.61|15.686	25.22	center	12.61	rhombic	flat	2	2D	4	sql	8-c (4,4)IV	(C132H96N6O14Zn4)n (C44H32N2O4Zn)n 10n(H2O)	catena-(bis(μ3-hydroxo)-bis(μ3-3-((4-(4-pyridylethenyl)phenyl)ethenyl)benzoato)-bis(μ-3-((4-(4-pyridylethenyl)phenyl)ethenyl)benzoato)-tetra-zinc(II) bis(μ-3-((4-(4-pyridylethenyl)phenyl)ethenyl)benzoato)-zinc decahydrate clathrate)	P.Ayyappan, O.R.Evans, Wenbin Lin	Inorg.Chem. (2002) 41, 3328.	http://dx.doi.org/10.1021/ic025524+	H2O
XOHNIS	N2O6Cd	C18H24O6P2	176	18.15	0	18.15	12.8345	25.669	center	12.8345	square	flat	2	2D	4	sql	8-c (4,4)IV	(C36H48CdN2O18P4)n	catena-(bis(μ-4,4'-bis(dimethylphosphonomethyl)biphenyl)-bis(nitrato-O,O')-cadmium(II))	Xiang-Dong Zhang, Chun-Hua Ge, Xiao-Yan Zhang, Chun-Yue Shi, Cui He, Jing Yin	Inorg.Chem.Commun. (2008) 11, 1224.	http://dx.doi.org/10.1016/j.inoche.2008.07.005	—
XOMGUC	Ag	C18H18N3O6Cr	135	12.401|13.087	0	12.742	7.649|9.978|10.407	20.386	long diagonal	10.193	kite	flat	2	2D	4	sql	8-c (4,4)IV	(C36H36AgCr2N6O12+)n n(BF4–) n(C7H8)	catena-(tetrakis(μ-3-Cyanoacetylacetonato-N,O,O')-bis(3-cyanoacetylacetonato-O,O')-di-chromium(III)-silver(I) tetrafluoroborate toluene solvate)	M.Kondracka, U.Englert	Inorg.Chem. (2008) 47, 10246.	http://dx.doi.org/10.1021/ic800748f	BF4– and toluene
XUDFAG	Co	C6H2O4S|C9H12N4	134	9.117|10.772	1	9.841	5.599|6.915|7.657	12.474	short diagonal	6.237	envelope	undulated	2	2D	4	sql	8-c (4,4)IV	(C15H14CoN4O4S)n 0.5n(C3H7NO)	catena-((μ-1,1'-(propane-1,3-diyl)di(1H-imidazole))-(μ-thiophene-2,5-dicarboxylato)-cobalt(II) N,N-dimethylformamide solvate)	Meng Qinghua	CSD Communication (2020).	http://dx.doi.org/10.5517/ccdc.csd.cc24hghm	DMF
XUGMOD	Ag	C11H9N2O2	138	11.696	0	11.696	5.997|10.041	11.994	center	5.997	rhombic	flat	2	2D	4	sql	8-c (4,4)IV	(C22H19AgN4O4)n	catena-((μ-4-(1H-imidazol-1-ylmethyl)benzoic acid)-(μ-4-(1H-imidazol-1-ylmethyl)benzoato)-silver(I))	Yang Song, Ruiqing Fan, Song Gao, Xinming Wang, Ping Wang, Yulin Yang, Yulei Wang	Inorg.Chem.Commun. (2015) 53, 34.	http://dx.doi.org/10.1016/j.inoche.2015.01.004	—
YASSEQ	CO2Co	C10H9N2|C11H9N2O2	138	11.755|11.817	0.02	11.786	7.541|9.037|9.078	18.115	long diagonal	9.0575	envelope	undulated	2	2D	4	sql	8-c (4,4)IV	(C22H18CoN4O4)n n(H2O)	catena-(bis(μ-4'-(imidazol-1-ylmethyl)benzoato)-cobalt(II) monohydrate)	Wei-Yin Sun,Yan-An Zhang,Taka-aki Okamura,Tao Ye,Norikazu Ueyama	Chem.Lett. (2000) 1222.	http://dx.doi.org/10.1246/cl.2000.1222	H2O
YIGRIR02	Cu4I4	C11H16N4	137	13.804	0	13.804	9.625|9.894	19.25	center	9.625	rhombic	flat	2	2D	4	sql	8-c (4,4)IV	(C11H16Cu2I2N4)n	catena-(bis(μ3-iodo)-(μ-1,1'-propane-1,3-diylbis(2-methyl-1H-imidazole))-di-copper(II))	Di Sun, Shuai Yuan, Hua Wang, Hai-Feng Lu, Sheng-Yu Feng, Dao-Feng Sun	Chem.Commun. (2013) 49, 6152.	http://dx.doi.org/10.1039/C3CC42741B	—
YIGRIR03	Cu4I4	C11H16N4	137	13.785	0	13.785	9.612|9.881	19.224	center	9.612	rhombic	flat	2	2D	4	sql	8-c (4,4)IV	(C11H16Cu2I2N4)n	catena-(bis(μ3-iodo)-(μ-1,1'-propane-1,3-diylbis(2-methyl-1H-imidazole))-di-copper(II)	Di Sun, Shuai Yuan, Hua Wang, Hai-Feng Lu, Sheng-Yu Feng, Dao-Feng Sun	Chem.Commun. (2013) 49, 6152.	http://dx.doi.org/10.1039/C3CC42741B	—
YISNUK	C2O4Ni	C13H14N2|C5H10	138	10.282|13.418	2.54	11.419	6.471|8.728|8.89	15.144	short diagonal	7.572	envelope	undulated	2	2D	4	sql	8-c (4,4)IV	(C20H24N2NiO4)n	catena-((μ-1,3-di(4-pyridyl)propane)-(μ-pentane-1,5-dicarboxylato)-nickel(II))	S.M.Krishnan,M.R.Montney,R.L.LaDuca	Polyhedron (2008) 27, 821.	http://dx.doi.org/10.1016/j.poly.2007.11.006	—
ZAZWAB	Cu4I4	C11H16N4	142	16.646	0	16.646	10.166|13.182	26.364	long diagonal	8.788	rhombic	flat	3	2D	8	8L5	12L14	(C22H32Cu4I4N8)n	catena-(tetrakis(μ-iodo)-bis(μ-1,1'-(pentane-1,5-diyl)di(1H-imidazole))-tetra-copper)	Yang Fang, Wei Liu, S.Teat, Litao An, Dechao Yu, Jing Li	Adv.Funct.Mater. (2017) 27, 1603444.	http://dx.doi.org/10.1002/adfm.201603444	—
ZOPZUB	Cu4Br4	C11H16N4	136	13.526	0	13.526	9.56|9.568	19.12	center	9.56	rhombic	flat	2	2D	4	sql	8-c (4,4)IV	(C11H16Br2Cu2N4)n	catena-(bis(μ3-bromo)-(μ-1,1'-propane-1,3-diylbis(2-methyl-1H-imidazole))-di-copper)	Li-Ping Xue, Xin-Hong Chang, Lu-Fang Ma, Li-Ya Wang	RSC Advances (2014) 4, 60883.	http://dx.doi.org/10.1039/C4RA10331A	—
ZOPZUB01	Cu4Br4	C11H16N4	136	13.526	0	13.526	9.553|9.575	19.106	center	9.553	rhombic	flat	2	2D	4	sql	8-c (4,4)IV	(C11H16Br2Cu2N4)n	catena-(bis(μ3-bromo)-(μ-1,1'-(propane-1,3-diyl)bis(2-methyl-1H-imidazole))-di-copper)	Rong-Yan Wang, Xiao Zhang, Jie-Hui Yu, Ji-Qing Xu	Photochem.Photobiol.Sci. (2018) 18, 477.	http://dx.doi.org/10.1039/C8PP00474A	—
ZOPZUB02	Cu4Br4	C11H16N4	136	13.507	0	13.507	9.49|9.611	18.98	center	9.49	rhombic	flat	2	2D	4	sql	8-c (4,4)IV	(C11H16Br2Cu2N4)n	catena-(bis(μ3-bromo)-(μ-1,1'-(propane-1,3-diyl)bis(2-methyl-1H-imidazole))-di-copper)	Rong-Yan Wang, Xiao Zhang, Jie-Hui Yu, Ji-Qing Xu	Photochem.Photobiol.Sci. (2018) 18, 477.	http://dx.doi.org/10.1039/C8PP00474A	—
ZOZSAK	Cu	C14H9N4O2	150	15.538|15.587	0	15.538|15.587	9.977|11.944	19.954	center	9.977	parallelogram	flat	2	2D	4	sql	8-c (4,4)IV	(C28H18CuN8O4)n 2n(H2O)	catena-(bis(μ-4-(3-(pyridin-4-yl)-1H-1,2,4-triazol-5-yl)benzoato)-copper(II) dihydrate)	Yong-Liang Liu, Ya-Pan Wu, Dong-Sheng Li, Wen-Wen Dong, Chun-Sheng Zhou	J.Solid State Chem. (2015) 223, 38.	http://dx.doi.org/10.1016/j.jssc.2014.05.022	—
ZUKVIN	Zn	C10H8O5|C14H14N4	136	10.989|11.304	1.96	10.971	7.256|8.241|8.451	16.576	long diagonal	8.288	envelope	undulated	2	2D	4	sql	8-c (4,4)IV	(C24H22N4O5Zn)n n(H2O)	catena-((μ-1,1'-(1,3-phenylene)bis(2-methyl-1H-imidazole))-(μ-4-(1-carboxylatoethoxy)benzoato)-zinc(II) monohydrate)	Z.-X.Xu, G.-G.Chen, L.-F.Li	Acta Crystallogr.,Sect.C:Cryst.Struct.Chem. (2020) 76, 125.	http://dx.doi.org/10.1107/S2053229620000182	H2O
ZUKVOT	Zn	C10H8O5|C14H14N4	136	10.985|11.3	1.96	10.967	7.249|8.242|8.452	16.578	long diagonal	8.289	envelope	undulated	2	2D	4	sql	8-c (4,4)IV	(C24H22N4O5Zn)n n(H2O)	catena-((μ-1,1'-(1,3-phenylene)bis(2-methyl-1H-imidazole))-(μ-4-(1-carboxylatoethoxy)benzoato)-zinc(II) monohydrate)	Z.-X.Xu, G.-G.Chen, L.-F.Li	Acta Crystallogr.,Sect.C:Cryst.Struct.Chem. (2020) 76, 125.	http://dx.doi.org/10.1107/S2053229620000182	H2O
